1 **Multiple quantitative trait loci contribute tolerance to bacterial canker**  
2 **incited by *Pseudomonas syringae* pv. *actinidiae* in kiwifruit (*Actinidia***  
3 ***chinensis*)**

4

5 Jibrán Tahir<sup>1</sup>, Stephen Hoyte<sup>2</sup>, Heather Bassett<sup>1</sup>, Cyril Brendolise<sup>3</sup>, Abhishek Chatterjee<sup>3</sup>, Kerry  
6 Templeton<sup>3</sup>, Cecilia Deng<sup>3</sup>, Ross Crowhurst<sup>3</sup>, Mirco Montefiori<sup>4</sup>, Ed Morgan<sup>1</sup>, Andrew Wotton<sup>1</sup>,  
7 Keith Funnell<sup>1</sup>, Claudia Wiedow<sup>1</sup>, Mareike Knaebel<sup>1</sup>, Duncan Hedderley<sup>1</sup>, Joel Vanneste<sup>2</sup>, John  
8 McCallum<sup>5</sup>, Kirsten Hoeata<sup>6</sup>, David Chagné<sup>1</sup>, Luis Gea<sup>6</sup> and Susan E. Gardiner\*<sup>1</sup>

9 1 The New Zealand Institute for Plant & Food Research Limited, Private Bag 11030, Manawatu Mail Centre,  
10 Palmerston North, 4442, New Zealand

11 2 The New Zealand Institute for Plant & Food Research Limited, Hamilton, New Zealand

12 3 The New Zealand Institute for Plant & Food Research Limited, Private Bag 92–169, Auckland, 1025, New  
13 Zealand

14 4 New Plant Soc. Cons. Agr., via Malpighi 5, Forlì, 47122, Italy

15 5 The New Zealand Institute for Plant & Food Research Limited, Lincoln, New Zealand

16 6 The New Zealand Institute for Plant & Food Research Limited, 412 No 1 Road, RD2, Te Puke 3182, New Zealand

17 \* Corresponding author ([Sue.Gardiner@plantandfood.co.nz](mailto:Sue.Gardiner@plantandfood.co.nz))

18

19 **Abstract:**

20 *Pseudomonas syringae* pv. *actinidiae* (Psa) Biovar 3, a virulent, canker-inducing pathogen is an  
21 economic threat to the kiwifruit (*Actinidia* spp.) industry worldwide. The commercially grown  
22 diploid (2x) *A. chinensis* var. *chinensis* is more susceptible to Psa than tetraploid and hexaploid  
23 kiwifruit. However information on the genetic loci modulating Psa resistance in kiwifruit is not  
24 available. Here we report mapping of quantitative trait loci (QTLs) regulating tolerance to Psa in  
25 a diploid kiwifruit population, derived from a cross between an elite Psa-susceptible ‘Hort16A’  
26 and a tolerant male breeding parent P1. Using high-density genetic maps and intensive  
27 phenotyping, we identified a single QTL for Psa tolerance on Linkage Group (LG) 27 of  
28 ‘Hort16A’ revealing 16-19% phenotypic variance and candidate alleles for susceptibility and  
29 tolerance at this loci. In addition, six minor QTLs were identified in P1 on distinct LGs, exerting

30 4-9% variance. Complete tolerance in the F1 population is attained by additive effects from  
31 ‘Hort16A’ and P1 QTLs providing evidence that divergent genetic pathways fend-off virulent  
32 Psa strain. Two different bioassays further identified new QTLs for tissue-specific responses to  
33 Psa. Transcriptome analysis of Psa-tolerant and susceptible genotypes in field revealed hallmarks  
34 of basal defense and provided candidate RNA-biomarkers for screening Psa tolerance.

35 **Keywords:**

36 Psa, kiwifruit, QTLs, field tolerance, bioassays, oligogenic tolerance, innate immunity

37

38 **Introduction**

39 *Pseudomonas syringae* is a hemi-biotrophic bacterial complex <sup>1</sup> that can infect a range of plant  
40 species. It comprises pathovars which cause similar symptoms on their host plants and several  
41 pathovars can lead to severe crop loss. *P. syringae* pv. *actinidiae* (Psa) infects several species of  
42 *Actinidia* (kiwifruit) <sup>2,3</sup> and virulent Psa strains induce a range of symptoms on the main stem of  
43 the vine, foliage, floral buds and fruits <sup>4</sup>. Psa pathovar’s strains can be grouped into five biovars  
44 based on their genetic and biological characteristics <sup>4,5</sup>. Strains of *biovar* 3, previously called  
45 Psa-V (referred to here as Psa), are currently the most aggressive and were responsible for  
46 outbreaks from the year 2008 <sup>6-9</sup>. Psa has cost the kiwifruit industry billions of dollars worldwide  
47 and its incursion in New Zealand in 2010 completely destroyed vines of the Psa-susceptible  
48 diploid *A. chinensis* ‘Hort16A’ <sup>4,8,10</sup>.

49 Most of the globally cultivated cultivars of kiwifruit, including *A. chinensis* (A Planch.) var.  
50 *chinensis*, *A. chinensis* (A Chev.) C.F. Liang et A.R. Ferguson var. *deliciosa*, as well as  
51 accessions from *A. arguta* and *A. kolomikta* are natural hosts of Psa <sup>10-18</sup>. Early reports of Psa  
52 infections and symptoms in *Actinidia* species emerged from Japan, China, Korea and Italy from  
53 1984 to 1994 <sup>2,3,13,14,16,17,19</sup>. The symptoms include cankers on trunk and leaders, cane death and  
54 stem collapse, discharge of red and milky exudates (ooze) from cankers, canes and abaxial leaf  
55 surfaces, tip browning, angular leaf necrosis (sometimes with chlorotic halos), shoot and leaf  
56 wilt, bud browning and flower blight. Strains of Psa infect *Actinidia* species with varying degrees  
57 of virulence, indicating a classical host-pathogen evolutionary relationship <sup>5,9,20-24</sup>.

58 Screening of thousands of *Actinidia* genotypes from 24 taxa in the breeding program at The New  
59 Zealand Institute for Plant & Food Research Limited (PFR) for tolerance to natural and artificial  
60 Psa infections<sup>25,26</sup> revealed that diploid (2x) *A. chinensis* var. *chinensis* are more susceptible to  
61 Psa infection than tetraploid (4x) *A. chinensis* var. *chinensis*, which in turn are more susceptible  
62 than diploid and hexaploid (6x) *A. chinensis* var. *deliciosa*<sup>25-27</sup>. Many species outside the *A.*  
63 *chinensis* complex are more tolerant to Psa than *A. chinensis* and the germplasm holds diverse  
64 genetic potential for Psa tolerance<sup>28</sup>. Information on the genetic markers and molecular  
65 mechanisms associated with *Psa* tolerance and resistance in the commercial cultivars producing  
66 taxas including *A. chinensis*, *A. deliciosa* and *A. arguta* is however limited. In this study we  
67 provide the first detailed view of the genetic loci modulating Psa tolerance and tissue-specific  
68 response in diploid *A. chinensis*, utilizing an intensively phenotyped population of seedlings  
69 developed from a cross between Psa-susceptible ‘Hort16A’ and a tolerant breeding parent (P1),  
70 as our experimental material for quantitative trait locus (QTL) analysis.

## 71 **Results**

### 72 **Intensive phenotyping targets diverse developmental stages and environmental conditions**

73 Initially, a pilot population of 53 genotypes from ‘Hort16A’ × P1 were replicated 3 times and  
74 phenotyped following natural field infection with Psa. The response to Psa infection in the  
75 expanded population was measured on 236 genotypes of ‘Hort16A’×P1 population, which were  
76 clonally replicated ~30 times. Phenotyping of the population was performed under field  
77 conditions following natural infection as well as using two bioassays (scheme for phenotyping is  
78 laid out in Supplementary Fig.1a). Multiple phenotypes were recorded in field (Fig. 1a-e) to  
79 develop a combined score referred to as Psa\_score\_Field (Fig. 2a). The mean clonal repeatability  
80 for this score was 0.65, while the repeatability of clonal means at 0.8. For the stab assay<sup>26</sup>,  
81 various tissue-specific phenotypic responses were recorded, including Stem\_necrosis,  
82 Leaf\_spots, Ooze, Stem\_collapse, Tip\_death and Wilt (Fig. 1f-k, Fig. 2b), with repeatability of  
83 clonal means for these scores as 0.60, 0.766, 0.64, 0.79, 0.78 and 0.71 respectively. A  
84 Psa\_score\_Stab was also calculated (Fig. 2b) from all phenotypes assessed in the Stab assay (see  
85 Experimental Procedures). In the flood bioassay, adapted from<sup>29</sup>, overall health was scored at  
86 weekly intervals post-inoculation (Flood Assay/FA\_Week1 to FA\_Week5) (Fig. 1l). The  
87 frequency distribution of phenotypes and Psa\_scores revealed that most exhibited non-Normal

88 distribution based on the Shapiro-Wilk test (Fig. 2). However, for the stab assay, the majority of  
89 the observations displayed normal distributions. (Fig. 2b). As such, the correlation among the  
90 phenotypic scores from the field assessments and the bioassays was found to be poor  
91 (Supplementary Fig.1b). The correlation among different phenotypes within the bioassays was  
92 medium to high. A 3-dimensional principal components analysis (PCA) on the correlation matrix  
93 of the field assessment, stab assay and flood assay displays a high degree of divergence in the  
94 rankings of the population for Psa response and tolerance when assessed through different  
95 approaches (Fig. 2d).

### 96 **Genotyping-by-Sequencing provided high-density genetic maps for ‘Hort16A’×P1** 97 **genotypes**

98 Using genotyping-by-sequencing (GBS)<sup>30</sup>, the population of ‘Hort16A’×P1 enabled the  
99 construction of high-density genetic maps utilizing 3,777 and 3,454 SNP markers, for ‘Hort16A’  
100 and P1 respectively (Supplementary Fig. 2 and 3) using Red5<sup>31</sup> and Hongyang<sup>32</sup> as reference  
101 genomes. The maps for ‘Hort16A’ and P1 encompassed a total genetic distance of 3,499 cM and  
102 3,875 cM, respectively, with an average density of 1 marker/ 2cM for both parents. All predicted  
103 29 LGs were constructed for ‘Hort16A’; however some were fragmented in P1 (LGs 3, 16, 19,  
104 23, 25, 27).

### 105 **QTL mapping from field phenotype scores confirmed oligogenic nature of Psa field** 106 **tolerance**

107 A QTL for control of field tolerance to Psa, Psa\_score\_Field, was identified in ‘Hort16A’ on the  
108 upper arm of LG27 (Fig. 3a) using multiple models for QTL discovery. At a LOD score of 7.02  
109 (Fig. 3a), the location of the LG27 QTL on the Red5 genome (version 1.69.0)<sup>33</sup> is between ~3.4  
110 to 4.6 Mbp. The LG27 QTL was also identified for Psa\_score-Field, in ‘Hort16A’ from the pilot  
111 trial (Supplementary Table1). A SNP marker G9P1 developed from Acc30822, a gene of  
112 unknown function underlying the QTL and a multi-allelic Simple Sequence Repeat (SSR)  
113 marker SSRLG27\_439F4R4, contributed 16% (favorable allele *b*) and 19% (favorable allele *v*,  
114 band size 428 bp) of the population phenotypic variance, respectively (Fig. 3g and  
115 Supplementary Table 1). The multi-allelic SSR marker revealed the contribution of the favorable  
116 428 bp *A. chinensis* grandparental allele *v*, to Psa tolerance (Fig. 3g), compared to the other 408  
117 bp allele *u* which is associated with susceptibility.

118 Using interval mapping and KW analysis, six QTLs were identified in P1, for Psa\_score\_Field  
119 indicating Psa tolerance is multigenic in P1. A single QTL with LOD score above 3 was located  
120 on the upper arm of LG22 (Fig. 3b), while three additional QTLs on LGs 3.1, 15 and 24  
121 (Supplementary Fig. 4), as well as two KW QTLs on LG14 (S14\_5310060,  $K$  value  $> 9$ ,  $P <$   
122  $0.0001$ ) and LG28 (S28\_1476180,  $K$  value  $> 7$ ,  $P < 0.0001$ ). From these, the effect of favorable  
123 grandparent alleles from P1 on field tolerance was verified from at least 3 QTLs i.e., by analysis  
124 of an SSR marker designed in the region underlying the LG22 QTL (SSRLG22\_8032664) (Fig  
125 3g and Supplementary Table1), a SNP marker E6P3 designed in a putative cell wall protein  
126 encoding gene Acc15766 within the LG14 QTL (Supplementary Fig. 5, Supplementary Table 1),  
127 and the LG28 QTL (SSRLG28\_1378F5R5) (Supplementary Fig. 5). Screening of  
128 SSRLG27\_439F4R4 in another set of field-grown ‘Hort16A’  $\times$  P1 progeny confirmed  
129 association of the  $v$  allele with tolerance (Supplementary Fig. 6a). The combination of favorable  
130 alleles from the ‘Hort16A’ LG27 QTL and three QTLs from P1 (LGs 14, 22 and 28) yielded a  
131 percentage variance of 40.6% (Supplementary Table 1): this combination identified ~80% of the  
132 tolerant ‘Hort16A’  $\times$  P1 genotypes in the field (Supplementary Fig. 7).

133 Since the QTL identified in ‘Hort16A’ has the highest effect, we predicted that this locus could  
134 be linked to susceptibility observed in diploid kiwifruit breeding parents. For this purpose, we  
135 performed validation of the LG27 QTL in another field grown *A. chinensis* population, derived  
136 from two Psa-susceptible parents ‘Hort22D’ and P2, using SSRLG27\_439F5R5 located ~3 kb  
137 distant from SSRLG27\_439F4R4. Data revealed that the 430/432 bp allele linked in *cis* with the  
138 previously described allele  $v$  was associated with tolerance in this population and was present in  
139 both parents, while the 440 bp allele  $z$  (size 440 bp) was linked to susceptibility and present in  
140 ‘Hort22D’ (Supplementary Fig. 6b). The region underlying the QTL on chromosome 27 spans  
141 orthologues of genes with putative functions involved in Pathogen-Associated Molecular Pattern  
142 (PAMPs) -triggered immunity (PTI), including cysteine rich receptor-like protein kinases, serine-  
143 threonine like protein kinase, enzymes involved in amino acid, carbohydrate and phosphate  
144 metabolism, sugar transporter, transcription factors, auxin-responsive and transport protein,  
145 epigenetic modulators and heat repeat-containing protein (Supplementary Table 2).

146 **Additional genetic hotspots associated with tissue and environment-specific phenotypic**  
147 **responses to Psa infection identified using bioassays**

148 *Analysis of Psa tolerance in P1 using stab assay and leaf infection*

149 The stab assay targets the vascular system and enabled a range of different phenotypes to be  
150 scored following Psa infection (Fig. 1f to k). P1 appeared to be relatively tolerant in comparison  
151 with ‘Hort16A’ in the stab assay, as in the field and grouped close to Psa-tolerant *A. arguta* and  
152 *A. chinensis* var. *deliciosa* for the Stem\_necrosis response to infection (Supplementary Fig. 8).  
153 Consistent with this, ‘Hort16A’ hosted significant growth of endophytic populations of Psa in the  
154 leaves, 10 days post-inoculation (Supplementary Fig. 9), compared with P1 and a Psa-tolerant  
155 tetraploid *A. chinensis* genotype both of which did not support endophytic growth of Psa over the  
156 same time period (Supplementary Fig. 9).

157 *QTLs for control of stem necrosis and collapse, tip death and Psa score determined in the stab*  
158 *bioassay*

159 Multiple interval mapping methods identified QTLs for control of Stem\_necrosis on LG13 in  
160 ‘Hort16A’ at three positions; S13\_6915810 and S13\_10678547, with a LOD score ranging  
161 between 4.5 and 9 (Fig. 3c) and S13\_13629983 (Supplementary Table 3). Moreover, QTLs were  
162 detected in the same region on LG13 for control of Stem\_collapse and Psa\_score\_Stab,  
163 indicating these were genetic hotspots for host-pathogen interaction in vascular tissues.  
164 Interestingly, QTLs for the control of Stem\_necrosis in P1 were identified on different  
165 chromosomes from those of ‘Hort16A’, namely the upper arm of LG16 and lower arm of LG23  
166 (Supplementary Table 4 and Supplementary Fig. 10). As for ‘Hort16A’, QTLs from P1  
167 coincided with those for other phenotypes including Tip\_death and Psa\_score\_Stab. A  
168 significant QTL for control of Psa\_score\_Stab was also detected on LG1 of P1 (Fig. 3f,  
169 Supplementary Fig. 11). It was noticeable that the Tip\_death phenotype generated multiple  
170 putative QTLs from both ‘Hort16A’ and P1 (Supplementary Fig. 12 and 13).

171 *Oozing as a symptom of Psa infection*

172 Oozing of a bacterial exudate was observed following Psa infection and QTLs for control of this  
173 phenotype were identified on LGs 2, 13 and LG15 (Supplementary Table 3 and Supplementary  
174 Fig.10) of ‘Hort16A’. For P1, QTLs were detected on the upper arm of LG27 (Fig 3d and  
175 Supplementary Table 4) and LG13. QTLs for control of the Ooze phenotype detected on LG13  
176 and 27 overlapped QTLs detected in ‘Hort16A’ for the Stem\_necrosis phenotype, as well as



177 Psa\_score\_Field. Other QTLs identified in ‘Hort16A’ and P1 using KW analysis for the Ooze  
178 phenotype are listed in Supplementary Table 3 and 4, respectively.

### 179 *Leaf spots and Wilt*

180 We observed symptomatic responses to Psa infection in leaf tissues distant from the point of  
181 inoculation in the stem. In ‘Hort16A’, QTLs for Leaf\_spots (Supplementary Table 3 and  
182 Supplementary Fig. 10) were detected on LGs 2, 5, 13 and 26. QTLs for Wilt in ‘Hort16A’ were  
183 detected on LGs 3, 13, 15 and 18. Most of these overlapped QTLs identified for Ooze and  
184 Stem\_necrosis. In P1, QTLs for Leaf\_spots (Supplementary Table 4 and Supplementary Fig. 11)  
185 were detected on LGs 1 and 5. A significant QTL was detected on LG10 of P1 for Wilt (Fig. 3e  
186 and Supplementary Table 4).

### 187 *Phenotypic tolerance to Psa exposure in tissue culture*

188 When ‘Hort16A’ x P1 population grown aseptically in tissue culture were challenged with Psa,  
189 multiple QTLs were detected for a health score at each weekly time-point (FA\_Week1 to  
190 FA\_Week5) (Supplementary Table 5). For ‘Hort16A’, *K* values were significant on LG15 at the  
191 third and fourth weeks following infection. A QTL on LG27 with lower significance overlapped  
192 the major QTL on LG27 identified in ‘Hort16A’ for Psa\_score\_Field. For P1, a significant QTL  
193 identified on the upper arm of LG13 for 3 and 4 weeks post-infection and overlapped the QTL  
194 region identified from phenotypes in the stab assay. Plant phenotypes changed dramatically  
195 during the period post-infection and additional QTLs were identified for health score at different  
196 time points (Supplementary Table 5).

197 The coordinates for all the QTLs in the Red5 genome versions 1.69.0<sup>33</sup> and 1.68.5<sup>31</sup> are  
198 provided in Supplementary Data 1.

### 199 **RNA-seq of ‘Hort16A’, P1 and F1 genotypes exhibiting Psa tolerance or susceptibility in** 200 **the field revealed patterns of innate immunity**

201 RNA-seq performed on healthy young leaf tissues from three groups of ‘Hort16A’ × P1 F1  
202 genotypes differing in field tolerance to Psa demonstrated clear differences in gene expression.  
203 The first group included three relatively tolerant- to medium-tolerant genotypes, including P1  
204 (Psa-TMT), while the second group included three fully susceptible genotypes, including

205 ‘Hort16A’ (Psa-Sus). At the same time, samples were harvested from the three most tolerant  
206 ‘Hort16A’xP1 genotypes, which had shown tolerance for four years in the field (Psa-FT). Heat  
207 maps and PCA plots of expression data from the pair-wise comparison between the three groups  
208 demonstrated extreme variation between the susceptible (Psa-Sus) and two tolerant groups (Psa-  
209 TMT and Psa-FT) (Fig. 4a to d). Differential gene expression analysis conducted between the  
210 groups of tolerant and susceptible genotypes at  $\alpha < 0.005$  with  $p$  values adjusted  $< 0.1$  revealed  
211 that from 31,588 genes, 23 (0.076%) were upregulated and 88 (0.28%) were downregulated in  
212 Psa-TMT compared with Psa-Sus (Supplementary Data2). Psa-FT genotypes exhibited 712  
213 differentially expressed genes (DEGs) when compared with Psa-Sus. Of these, 172 (0.59%) were  
214 upregulated and 539 (1.9%) were downregulated in Psa-FT genotypes compared to Psa-Sus  
215 (Supplementary Data2). Seventy-seven genes (0.24%) were differentially expressed in common  
216 among tolerant genotypes of the Psa-FT and Psa-TMT groups when each was compared with  
217 Psa-Sus (Fig. 4e and f and Supplementary Data 2).

#### 218 *DEGs in Psa-TMT and Psa-FT groups compared to Psa-Sus genotypes*

219 The gene families upregulated in common in Psa-TMT and Psa-FT genotypes are mostly  
220 orthologues of protein-coding genes involved in plant basal defense against pathogens or  
221 Pathogen-Associated Molecular Patterns (PAMPs)-triggered immunity (PTI), cost of defense,  
222 cell wall and carbohydrate metabolism and other functions (Table 1). Psa-FT genotypes exhibit  
223 upregulation of a high number of genes with functions related to defense. The genes significantly  
224 downregulated in common in both tolerant genotypes, Psa-TMT and Psa-FT compared with Psa-  
225 Sus, are orthologues of protein coding genes involved in chromatin modulation such as histone  
226 encoding proteins, auxin efflux, and abiotic and biotic defense (Table 1).

#### 227 *Integrated view of QTLs and DEG in field*

228 A Circos plot of all the QTLs and the DEGs anchored on the Red5 genome 1.69.0, highlighted a  
229 number of DEGs that co-localized with the QTL regions (Fig. 5). Circos diagrams for individual  
230 phenotypes are presented in Supplementary Figs.14 to 16 for phenotypes from the field, Stab  
231 bioassay and Flood bioassay, respectively.

#### 232 *Validation of expression of candidate genes*



233 From the list of candidate DEGs (Table 1), relative expression of a few genes with diverse  
234 putative functions was verified in the genotypes from all three groups (Psa-TMT, Psa-FT, Psa-  
235 Sus), using real time quantitative reverse transcription polymerase chain reaction (RT-qRT-PCR)  
236 (Fig 6). Genes including Acc23960.1 (*Transducin/WD40 repeat-like superfamily protein*),  
237 Acc16485.1 (*alpha-glucan phosphorylase*) Acc30767.1 (*UDP-Glycosyltransferase superfamily*  
238 *protein*), Acc08664.1 (*Ammonium transporter*), Acc18987.1 (*MLP-like protein 423*),  
239 Acc03527.1 (*AGAMOUS-like*) and Acc08233.1 (*NAD(P) binding protein superfamily*), showed  
240 significantly higher expression in Psa-FT and Psa-TMT genotypes compared to Psa-Sus  
241 genotypes. Comparatively, genes including Acc01014.1 (*Salicylic acid carboxyl*  
242 *methyltransferase*), Acc24057.1 (*Auxin efflux carrier family protein*), Acc04255.1 (*Acyl-CoA N-*  
243 *acyltransferases (NAT) superfamily*) and Acc13577.1 (*Nudix hydrolase*) were significantly  
244 expressed in Psa-Sus compared to Psa-FT and Psa-TMT genotypes.

245 Further we explored the expression of these genes in leaf tissues of ‘Hort16A’ and P1 plants,  
246 inoculated with Psa for bacterial growth assessments (Supplementary Fig. 9), at 0 and 24 hrs  
247 time points post-infection. We found that Acc16485.1 (*alpha-glucan phosphorylase*) and  
248 Acc03527.1 (*AGAMOUS-like*) were significantly upregulated in P1 at 0 and 24 hrs post-infection  
249 compared to ‘Hort16A’ suggesting that their expression is naturally higher in the tolerant parent  
250 or suppressed in the susceptible parent and is not induced during early hours of Psa infection  
251 (Supplementary Fig. 17). Rest of the candidate genes were not differentially expressed in  
252 between the two parents at both time points except Acc08664.1 (*Ammonium transporter*) which  
253 was found to be significantly up-regulated in P1 within 24 hrs post-infection compared to  
254 ‘Hort16A’ (Supplementary Fig. 17).

255 .

## 256 Discussion

257 This study provides the first information about genetic loci involved in the host-pathogen  
258 relationship between *A. chinensis* and Psa. Although a genetic map of the chromosomal location  
259 of basal defense and R-genes has been reported<sup>34</sup>, there has been no previous genetic mapping  
260 of Psa resistance. Our study employed natural field and artificial infection data in three  
261 environments over multiple years, combined with genetic and transcriptomic experiments in a  
262 segregating population resulting from a cross between Psa-susceptible ‘Hort16A’ and a tolerant

263 male P1, to develop an understanding of the genetic factors underpinning quantitative tolerance  
264 to Psa in diploid *A. chinensis*.

265 QTL mapping of the field phenotypic data following natural infection demonstrated the  
266 oligogenic nature of this field tolerance, with a single major-effect QTL for tolerance being  
267 identified on LG27 in ‘Hort16A’ and six minor-effect QTLs on LGs 3, 14, 15, 22, 24 and 28 of  
268 P1. In addition, we demonstrated the interaction of four of the QTLs (LGs 27, 14, 22, 28),  
269 accounting for 30 to 40% of the total variance. Our results are consistent with reports of  
270 quantitative tolerance against sub-species of *Pseudomonas syringae*<sup>35-38</sup> in other hosts and  
271 reinforce the long-standing view that no single genetic model can account for incomplete or  
272 partial resistance<sup>39,40</sup>. The major QTL on LG27 of ‘Hort16A’ (initially identified in the field for  
273 control of tolerance and expressed as Psa\_score\_Field) overlaps QTLs for tissue specific  
274 responses (Fig. 5). These were for the Ooze phenotype in the stab bioassay in both parents (on  
275 LG27.1 S27\_4621046 in P1 and LG27 4358305 in ‘Hort16A’) and for the FA\_Week3 phenotype  
276 in ‘Hort16A’ (on LG27, S27\_4853516). In addition, a number of other QTLs identified from the  
277 stab bioassay overlapped in the genomic regions S13\_6915810 and S13\_10678547 on LG13  
278 (Ooze, Tip\_death, Stem\_necrosis and Psa\_score\_Stab) (Fig. 5). As stem necrosis leads to  
279 collapse of the vascular structure, we suggest that oozing, together with stem necrosis, is not only  
280 an important phenotype for assessing tolerance to Psa, but also possibly points towards diverse  
281 mechanisms providing field tolerance in *A. chinensis*, that might involve cell wall strengthening  
282 and basal defense.

283 Validation of SSR markers underlying the QTL on LG27 in an independent population of the  
284 same cross, as well as another diploid *A. chinensis* population, supports association of this region  
285 with Psa tolerance. Genetic analysis of the polymorphism under the LG27 QTL region in  
286 ‘Hort16A’ × P1 and other populations indicated that tolerance to Psa is recessive and derived  
287 from the male parent of ‘Hort16A’ and that there is likely a susceptibility gene(s) in this region  
288 of diploid *A. chinensis*. Further investigation in the kiwifruit germplasm for tolerance-associated  
289 haplotypes in this region will aid in fine mapping and the search for candidate gene(s) for Psa  
290 tolerance.

291 Pyramiding of pest and disease resistance loci to enhance durability is an important focus of  
292 most crop breeding programs<sup>40,41</sup>. Marker-Assisted Selection (MAS) has been recognized as a

293 useful tool in breeding perennial fruit crops for major traits such as disease tolerance, flowering,  
294 ripening<sup>42-45</sup> and is the most efficient route to pyramiding of resistance loci. The first step  
295 towards using MAS to improve the efficiency of breeding new Psa-tolerant *A. chinensis* cultivars  
296 is the identification of key genetic loci controlling field tolerance to Psa. The moderate-high to  
297 high resistance to Psa identified in diploid *A. chinensis* seedlings in PFR breeding populations  
298 was reported to be under polygenic control<sup>25</sup> and our study has identified a number of genetic  
299 loci associated with field tolerance and tissue-specific responses to Psa.

300 The polygenic nature of tolerance to the pathogen is both an advantage and a disadvantage for  
301 breeders. Quantitative resistances that aggregate small effects from multiple genes are relatively  
302 durable in comparison to qualitative resistances, as virulent pathovars can more readily evade  
303 single *Resistance (R)* gene-based resistance<sup>46,47</sup>. Furthermore, quantitative resistances can also  
304 improve the durability of *R*-gene mediated resistances<sup>48</sup>. However, validation of genetic markers  
305 for multiple QTLs in the populations of different ploidy levels that exist in *A. chinensis* can be a  
306 challenge. As multiple sources of resistance to *Psa* from a range of species exist in New Zealand  
307 kiwifruit germplasm<sup>25,27,49</sup>, resistance pyramiding based on multiple QTLs is a sustainable first  
308 approach in a kiwifruit breeding program and can be strengthened in future with yet unidentified  
309 *R* gene resistances against Psa. The oligogenic tolerance to Psa in *A. chinensis* that we have  
310 described provides a framework that could lead to the development of durably Psa-resistant  
311 cultivars.

312 Pathovars of *P. syringae* have a complex relationship with their hosts<sup>50</sup> and develop a range of  
313 phenotypes in annual or perennial plant species<sup>51</sup>. Additional QTLs were identified for  
314 associated with tissue-specific responses of *A. chinensis* to Psa in the stab and flood bioassays  
315 and some of these overlapped. For example, QTLs for phenotypes in vascular tissues including  
316 Stem\_necrosis, Stem\_collapse and Ooze were adjacent or overlapped on LGs 13 and 16, but  
317 QTLs for leaf-associated phenotypes in the stab assay including Wilt, Leaf\_spots and Tip death  
318 and overall health score recorded in the flood assay (FA\_Week1-5) were located on LGs 3, 5, 7,  
319 10 and 18 (Fig 5). This is consistent with a previous finding where distinct quantitative genetic  
320 variation underlies leaf and stem specific phenotypic responses to a pathogen<sup>52</sup>. As the QTLs  
321 located using bioassays were not identified for field Psa tolerance, it appears probable that  
322 different genetic mechanisms regulate the response to Psa infection in different environments  
323 and in different tissues. Many environmental factors differ in greenhouse and in *in vitro* growth

324 conditions compared to the field so might contribute to the plasticity of plant phenotypic  
325 responses. This includes factors such as temperature<sup>53-55</sup>, humidity<sup>56-60</sup>, other microbial  
326 communities in the field, as well as physiological changes during the growth and aging of *A.*  
327 *chinensis* vines may have an effect. In the future, elucidation of the role of the genetic loci  
328 regulating the observed tissue-specific responses to Psa infection will be helpful in determining  
329 the dynamics of the host-pathogen relationship in the disease triangle of the *A. chinensis* / Psa  
330 patho-system<sup>61</sup>. Remarkably, a number of the QTLs identified in the bioassays overlie  
331 differentially expressed genes, identified from RNA-seq data from field tolerant and susceptible  
332 genotypes (Fig. 5).

333 In general, the association of genes determining quantitative tolerance with a range of  
334 mechanisms of innate immunity or PTI enables them to act effectively to counter the virulence  
335 strategies of pathogens during different stages of plant development<sup>62</sup>. In *A. chinensis*, the  
336 genome assembly has demonstrated that more genes are associated with PTI, than with *R* gene  
337 based Effector-Triggered Immunity (ETI), implying a strong selective pressure on the expansion  
338 of genes involved in PTI<sup>32</sup>. Further evidence for this notion comes from studies exploring the  
339 transcriptome of the kiwifruit-Psa interaction the in period directly following inoculation<sup>63-65</sup>.  
340 Data obtained from our study have provided a list of classes of gene families underlying the  
341 QTLs that might be directly or indirectly involved in the innate immune response of *Actinidia*  
342 and its host-pathogen relationship with Psa over the longer term in the field.

343 The region underlying the most significant QTL on chromosome 27 are associated with plant  
344 defense. (Supplementary Table 2).. A gene encoding a putative cell wall protein Acc15766  
345 (Acc15766.1), located under the P1 LG14 QTL for field tolerance, was employed to design SNP  
346 marker E6P3. Two QTLs on LG13 of 'Hort16A' were repeatedly identified in association with  
347 control of stem necrosis and health, and Psa score in bioassays, as well as in field screens.  
348 Underlying these QTLs were two genes, one an orthologue of *Ethylene production protein*  
349 *1/ETO1* (Acc14810.1) that is intricately linked with a plant's susceptibility to pathogens<sup>66</sup>, and  
350 the other a *Protein ENHANCED DOWNY MILDEW 2/EDM2* (Acc14938.1), which is involved in  
351 DNA methylation, transcriptional regulation and plant resistance to an oomycete pathogen<sup>67</sup>.

352 In the present study we performed RNA-seq on different groups of F1 genotypes from a single  
353 population exhibiting extreme variation in field tolerance and susceptibility to natural Psa levels

354 for at least 3 years to explore genes that are associated with Psa tolerance and susceptibility in  
355 field over an extended time period. A putative orthologue of *UGT72B1*, which is highly  
356 expressed in tolerant Psa\_TMT and Psa\_FT genotypes and localized within 2-LOD interval of  
357 Psa\_score\_Field QTL on LG 27. Association of *UGT72B1* with non-host resistance against a  
358 fungal pathogen has been suggested, as it encodes an enzyme of the phenylpropanoid pathway<sup>68</sup>.  
359 RT-qRT-PCR analysis on samples from controlled inoculation further showed that this gene is  
360 induced 24 hrs post-Psa infection in both ‘Hort16A’ and P1, however this needs to be validated  
361 if this is the causal gene in Psa tolerance. *EDM2* is significantly upregulated in the field-tolerant  
362 Psa-FT genotypes and co-localizes with the QTL on LG13 associated to stem necrosis and  
363 collpase. A gene encoding putative cellulose synthase (Acc15562.1), located on the upper arm of  
364 LG14, was upregulated in field-tolerant genotypes and might play a role in strengthening the  
365 vascular system. On LG24, an orthologue of a Histone protein coding gene (Acc27699.1) that  
366 was downregulated in field-tolerant genotypes (Psa-FT and Psa-TMT) underlies a P1 QTL that is  
367 associated with field tolerance.

368 Other gene families that are differentially expressed encode proteins with putative functions  
369 associated with PTI, for example detoxification-like protein Acc00747.1<sup>69</sup>, a MADS-box like  
370 transcription factor Acc03527.1<sup>70</sup>, terpene synthases Acc13740.1, Acc13742.1, Acc22685.1,  
371 Acc22685.1<sup>71</sup>, MLP-like proteins Acc18987.1, Acc13742.1<sup>72</sup> Acc20584.1, Acc20586.1  
372 thioredoxin-like protein<sup>73</sup>, cellulose synthase-like protein Acc27502.1<sup>74</sup>, WD40-repeat  
373 containing super-family protein Acc23960.1<sup>75</sup>, UV-B-induced protein DUF760 Acc25706.1,  
374 Acc14728<sup>76</sup>, protein of unknown function (DUF247) /Acc08767, ammonium transporter 2/  
375 Acc08664.1<sup>77</sup>. A defense gene that is linked to carbohydrate metabolism that was upregulated in  
376 Psa-TMT but downregulated in Psa-FT encodes a putative beta-galactosidase Acc13005.1.

377 Furthermore, we also verified the expression of the candidate genes associated with plant  
378 immunity in Psa-TMT, Psa-FT and Psa-Sus genotypes using gene-specific primers. Consistent  
379 with the RNAseq data, we found these genes to be significantly differentially expressed in the  
380 tolerant genotypes compared to susceptible genotypes. Specifically, Acc16485.1 (*Alpha-glucan*  
381 *phosphorylase*), Acc03527.1 (*AGAMOUS-like*) and Acc08664.1 (*Ammonium transporter*) genes  
382 were confirmed to be significantly induced in P1 in greenhouse and field tolerant genotypes.  
383 Acc03527.1 (*AGAMOUS-like*) is located very close to the QTL on LG3 in P1 for  
384 Psa\_score\_Field and an ammonium transporter gene has been recently shown to be involved in

385 stem rust resistance in wheat<sup>77</sup>. Our study therefore provide new resource for candidate RNA-  
386 biomarkers for predicting tolerance in kiwifruit field breeding nurseries that can lead to improve  
387 the speed of selective breeding of multi-genic trait<sup>78</sup>.

388 Expansion of the pathogenic *P. syringae* strains and their divergence with respect to virulence  
389 factors and toxins, as well as antimicrobial compounds<sup>5,79,80</sup>, indicate that the capabilities of this  
390 pathogen in suppressing plant defense are remarkable. Advances in the genomics of both *A.*  
391 *chinensis* and *Psa* make them a powerful plant–pathogen model system in the context of  
392 perennial host species. Results from this study will be utilized to develop MAS for *Psa* tolerance  
393 in diploid breeding populations and to elucidate the molecular mechanisms to fend off the  
394 virulent strain of *Psa*.

## 395 **Methods**

### 396 *Plant material*

397 The populations for genetic mapping of resistance to *Psa* were progeny of a cross between *Psa*-  
398 susceptible ‘Hort16A’ (female) and tolerant P1 (male) and comprised of three sets of population.  
399 The first set, a pilot population comprised 53 genotypes that were clonally propagated 3 to 5  
400 times through cuttings, planted at the PFR Te Puke Research orchard and maintained under  
401 standard orchard conditions from 2013 to 2016. The expanded population of 236 ‘Hort16A’ × P1  
402 F1 genotypes was germinated in 2015 aseptically in standard tissue culture growth conditions<sup>81</sup>.  
403 Each genotype was replicated 35–40 times from cuttings, either in tissue culture or under  
404 standard greenhouse conditions, prior to field phenotyping or bioassays (Supplementary Fig. 1).  
405 Field planting of 230 genotypes (6 to 14 replicates per genotype), was in a randomized block  
406 design, in February 2017 at Te Puke and Kerikeri research orchards. A third ‘Hort16A’ × P1  
407 population, of 128 genotypes, was planted in February 2016 in Te Puke and utilized for  
408 validation of the genetic markers developed in the other two populations. A diploid *A. chinensis*  
409 population ‘Hort22D’ × P2 with 433 individuals was used for marker validation. This  
410 population, was maintained under standard orchard conditions from 2011 to 2017 in the Kerikeri  
411 research orchard where it was sprayed with antibacterial sprays including copper to suppress  
412 disease symptoms, in accordance with the Kiwifruit Vine Health guidelines. We note that the  
413 great great grandfather of P2 is the father of ‘Hort16A’.



#### 414 *Phenotyping*

415 The pilot field population was phenotyped monthly for symptoms from natural Psa infection  
416 between 2013 and 2015 and the data used to develop the phenotypic scoring for the expanded  
417 population, for which phenotyping was monthly from February 2017 to September 2018. Traits  
418 scored included cane death, ooze, shoot death and tip death (Fig. 1). Presence/absence of leaf  
419 spots was not recorded, as scores in the pilot study exhibited high between-plant variability. A  
420 cumulative Psa score (Psa\_score\_Field) was calculated, with removals due to oozing and >50%  
421 cane death scoring twice as highly as tip death and shoot death. Least squares mean (LS Mean)  
422 was calculated for each individual genotype, based on this score.

423 The bioassays were performed in controlled environments, with the stab bioassay <sup>26</sup>, being  
424 performed between September to December and February to April, in 2016, 2017 and 2018.  
425 Inoculations were performed with 10627 SmR, a naturally occurring streptomycin-resistant  
426 isolate of Psa biovar 3 <sup>82,83</sup>, in the greenhouse with temperatures of 22 to 30°C. In total, 200  
427 genotypes were phenotyped using the stab bioassay, with 35 batches phenotyped across three  
428 years. Details are in Supplemental Methods S1. The flood bioassay <sup>29</sup> was performed by flooding  
429 six biological replicates of each genotype with Psa, that had been grown on tissue-culture media  
430 in an aseptic growth medium in a tub for 4 to 6 weeks. Details are provided in Supplemental  
431 Methods S1.

#### 432 *Bacterial inoculations for assessment of growth curve in resistant vs. susceptible plants*

433 Assessment of the growth curve for Psa in ‘Hort16A’ and P1 was performed using multiple  
434 biological replicates in the greenhouse, as described for the stab test bioassay. Young potted  
435 kiwifruit plants were inoculated with Psa, on 8 to 10 biological replicates of each genotype in  
436 February, 2018. Further details are provided in Supplemental Methods S1.

#### 437 *Genotyping, genetic maps and QTL mapping*

438 DNA was extracted from freeze-dried leaves using the Cetyl trimethylammonium bromide  
439 (CTAB) method <sup>84</sup>. GBS libraries were prepared for 53 individuals from the pilot population and  
440 236 individuals from the expanded population, as well as the two parents, using the method  
441 described in detail by <sup>85</sup>, modified from the standard GBS protocol <sup>30</sup>. The individual and pooled  
442 libraries were checked for quality with a Fragment Analyser (Advanced Analytical) and pooled

443 libraries with satisfactory QC were dried down and dispatched to the Australian Genome  
444 Research Facility (AGRF) for single-end sequencing on an Illumina® HiSeq™ platform. The  
445 sequencing reads were de-multiplexed based on GBS library preparation barcodes using the ea-  
446 utils.1.1.2-537 package and those reads starting with the approved barcode immediately followed  
447 by the remnant of the *Bam*HI cut site sequence were retained for further analysis. Variant calling  
448 and genotyping was performed using TASSEL v3.0 and 5.0 and ~60,000 and 80,000 SNP calls  
449 were generated for the individuals in the two populations, respectively. SNP calling was  
450 performed using an early version of the Red5 genome (1.68.5), which preceded the 1.69.0  
451 version <sup>33</sup>, and the ‘Hongyang’ genome <sup>32</sup> as references. Genome coordinates for the Red5  
452 version 1.68.5 were converted to those of the published version using in-house PERL scripts  
453 (available on request from Ross Crowhurst, PFR). The coordinates for SNPs associated with the  
454 QTL peaks in the published Red5 genome are listed in Supplementary Data1. The SNP calls  
455 represented 70% coverage of the expanded population. In our data sets (Supplementary Data 1),  
456 Red5 markers begin with S, whereas markers generated from ‘Hongyang’ begin with HY,  
457 followed by the number of the linkage group and the position of the marker on the respective  
458 physical genome (for example S1\_10661198 or HY10\_1385907). The SNP data were  
459 subsequently filtered to obtain 9,875 and 9,327 SNP markers polymorphic between ‘Hort16A’  
460 and P1, respectively (3,364 for P1 in pilot study). JoinMap v 5.0 <sup>86</sup> was used to develop genetic  
461 linkage maps for both the parents, at a LOD score between 15 and 22. QTL mapping was  
462 performed using the rQTL package <sup>87</sup> and MapQTL5 software <sup>88</sup>. Multiple QTL models,  
463 including Maximum likelihood (EM), Haley-Knott regression, Non-parametric, multiple  
464 imputation and Kruskal-Wallis analysis (KW) were employed for single QTL scans.

#### 465 *RNA-seq and RT-qRT-PCR*

466 Total RNA was extracted from healthy young leaves, at the sixth to ninth position from the  
467 apical leaf, from genotypes in the field that were segregated into three groups based on  
468 susceptibility to Psa. The first two groups were of two-year-old plants that were defined  
469 respectively as: 1) tolerant/medium tolerant (Psa-TMT), consisting of three relatively Psa-  
470 tolerant genotypes, including P1, and 2) susceptible (Psa-Sus), comprising three fully Psa-  
471 susceptible genotypes including ‘Hort16A’ based on observations of 8 to 11 biological  
472 replicates. The third group (Psa-FT) exhibited field tolerance to Psa over four years. RNA  
473 extraction was from samples snap frozen with liquid nitrogen, using the Spectrum Total Plant

474 RNA kit (Sigma-Aldridge, Auckland, New Zealand) and QC was performed with the Fragment  
475 Analyzer to select RNA with RNA Integrity Number (RIN) of 7.1-8.2. Samples from three  
476 biological replicates were pooled. Library preparation at the Australian Genome Research  
477 Facility used the TruSeq Stranded kit and subsequent paired-end Illumina® sequencing  
478 employed the NovaSeq6000 platform. An average of ~19 million, 150 bp paired-end reads were  
479 retrieved for each sample (~6 Gb) and read sequences of low-quality, ribosomal RNA as well as  
480 adaptors were filtered out using Trimmomatic<sup>89</sup> and SortMeRna<sup>90</sup>. RNA-seq reads were aligned  
481 to the Red5 reference gene models using STAR and differential expression analysis was  
482 performed using DESeq2<sup>91</sup>. The details concerning the target file, read statistics and DEGs are  
483 provided in Supplementary Data2.

484 For RT-qRT-PCR on field samples, RNA was extracted (as described above) from 3-7 clonal  
485 replicates of each genotype from Psa-TMT and Psa-Sus group from healthy leaf tissues. RNA  
486 was extracted from leaf tissues of 5 different genotypes in Psa-FT group, as these genotypes are  
487 not clonally replicated. For RT-qRT-PCR on infected tissues, samples were harvested from the  
488 leaf tissues used for assessment of bacterial growth curve as described above. A 10mm leaf disc  
489 was harvested from the region infected with Psa, at 0, 6, 24 and 48 hrs post-infection, and frozen  
490 in liquid nitrogen. One leaf disc was harvested from a single clonal replicate of 'Hort16A' and P1  
491 per time point and three biological replicates were harvested at each time point. Data from 0 and  
492 24 hrs time is only presented in the study. Total RNA (~ 2 µg) was treated with DNase I (Roche  
493 Applied Sciences) and used for cDNA synthesis using SuperScript IV Reverse  
494 Transcriptase (Life Technologies-Invitrogen). The cDNA was diluted 20-fold and used for  
495 qRT-PCR employing a LightCycler® 480 SYBR Green 1 Master PCR labelling kit (Roche  
496 Applied Sciences) and RotorGene 3000 Real time PCR machine (Corbett Research, Sydney,  
497 Australia). Relative transcript abundance was determined relative to the mean of the expression  
498 of *Actin* and *Ubiquitin* genes in the same sample. Comparative quantification was performed as  
499 described<sup>92</sup>. Primers used for genes are provided in Supplementary Table 6.

#### 500 *SSR and SNP marker design and screening*

501 Repeats were identified manually in the genome sequence underlying the QTLs. PCR primers for  
502 SSR markers were designed using Primer3 and employed to screen DNA extracted from the  
503 populations<sup>93</sup>. Analysis and scoring of the alleles in the amplicons was performed on a Hitachi

504 ABI3500 Applied Biosystems genetic analyzer. Primers were also designed around SNPs in the  
505 genes identified in the genomic sequence of Red5 underlying the QTLs. The SNP markers were  
506 screened using real-time High Resolution Melting analysis<sup>94</sup>. All primer sequences are provided  
507 in Supplementary Supplementary Table 6

508

### 509 **Acknowledgements**

510 We would like to acknowledge AgMARDT New Zealand for a post-doctoral fellowship to JT  
511 and funding the work. Financial support was also provided by; 1) PFR Strategic Science  
512 Investment Funds Breeding Technology Development, 2) Kiwifruit Breeding Programme and 3)  
513 KRIP Phenotyping Bioassays. We acknowledge the assistance of Belinda Diepenheim, Andrew  
514 Mullan, Renata Blissett, Bruce Dobson, Matt Spier, Judith Rees, Janet Phipps, Deidre Cornish,  
515 Janet Yu, Jenny Oldham and Jaqui Wallace.

516

### 517 **Author Contributions**

518 JT performed pathogen infection experiments, DNA extractions, GBS, RNA-seq, RT-qRT-  
519 PCRs, data analysis, genetic map construction, QTL mapping, designed the SNP and qPCR  
520 markers. JT, SEG and DC wrote the manuscript. LG performed field phenotyping. SH performed  
521 stab assay. HB developed SSR markers and performed validation of the markers. CB, AC, KT  
522 and MM performed flood assay. EM, AW and KF performed replication of the genotypes in the  
523 tissue culture and greenhouse. CW performed validation of the breeding parents from the  
524 germplasm. CD performed GBS analysis. RC developed circos view of QTLs and RNA-seq data.  
525 MK performed DNA extraction for the validation population. JT, DH and LG performed  
526 statistical analysis of the data. JV performed bacterial growth assessments. JM performed  
527 validation of the LG27 QTL in the breeding germplasm. KH managed orchard plantations of the  
528 genotypes.

### 529 **Competing interests**

530 I declare that the authors have no competing interests as defined by Nature Research, or other  
531 interests that might be perceived to influence the results and/or discussion reported in this paper.

### 532 **Figure Legends**

533 Fig. 1. Phenotypic responses in *Actinidia chinensis* plants in response to *Pseudomonas syringae*  
534 pv. *actinidiae* (Psa) exposure. Field phenotypes include (a) Leaf\_spots (b) Tip\_death (c)  
535 Cane\_death (d) Ooze and (e) Shoot\_death. Phenotypes observed in the stab bioassay include f)  
536 Stem\_necrosis, g) Leaf\_spots, h) Ooze, i) Stem\_collapse, j) Tip\_death, k) Wilt and l) is a  
537 representative flood assay (FA\_Week3) phenotype for disease response.

538 Fig. 2. Distribution of phenotypes in the ‘Hort16A’ × P1 mapping population of 236 genotypes.  
539 a) Least squares mean (LS Mean) of Psa\_score\_Field after 15 months in the field. The x-axis  
540 displays the progression of susceptibility from left to right, while the y-axis represents frequency  
541 in the population. b) LSM of phenotypes from the stab assay, including Stem\_necrosis,  
542 Stem\_collapse, Tip\_death, Psa\_score\_Stab, Ooze, Leaf\_spot and Wilt. c) Means of the health  
543 score from Flood bioassays (FA\_Week 1 to FA\_Week5). The WSTATISTIC is from the  
544 Shapiro-Wilks test for the null hypothesis that the distribution is normal. Phenotypic scores with  
545  $P < 0.001$  are rejected for the hypothesis that these distributions are normal. d) Principal  
546 components analysis on the correlation matrix of the field assessment, flood assay and stab assay  
547 measures. Genotypes are shown as points and measurements are shown as vectors (lines pointing  
548 from the origin) defined by their correlation with the three principal components.

549 Fig. 3. Quantitative trait loci (QTLs) from ‘Hort16A’ and P1 for control of field tolerance and  
550 tissue specific symptomatic responses to Psa. The outputs depict quantitative trait loci (QTL)  
551 scans with different models. a) linkage group (LG)27 of ‘Hort16A’, b) LG22 of P1, both for  
552 Psa\_score\_Field. From stab assay phenotypes major QTLs on: c) LG13 in ‘Hort16A’ for  
553 Stem\_necrosis, and in P1 on d) the upper arm of LG27 for Ooze, e) LG10 for Wilt and f) LG1  
554 for Psa\_score\_Stab. SNPs at peaks are indicated. g) shows dot plot analysis of the allelotypes of  
555 markers underlying quantitative trait loci derived from the Psa\_score\_Field for the population  
556 ‘Hort 16A’ × P1’.

557 Fig. 4. RNA-seq analysis of ‘Hort16A’ × P1 genotypes, exhibiting tolerance or susceptibility to  
558 Psa in the field. RNA-seq was performed on young healthy leaf tissues of field-grown plants  
559 belonging to three groups based on relative tolerance / susceptibility. The first group included  
560 three relatively Psa-tolerant plants (Tolerant to Medium Tolerant /Psa-TMT). The second group  
561 included three fully Psa-susceptible genotypes, including ‘Hort16A’ (Psa-Sus). All had been  
562 exposed to Psa for 1 year in the field. The third group represents the three most tolerant

563 genotypes, tolerant over 3 years in the field (Psa-FT). a) and b) show heat-maps for the genome  
564 wide differential expression (DE) analysis in Psa-TMT vs Psa-Sus and Psa-FT vs Psa-Sus  
565 respectively. c and d) are plots of Principal component analysis for the DE in Psa-TMT vs Psa-  
566 Sus and Psa-FT vs Psa-Sus respectively. e) shows volcano plots for the DE, with significantly  
567 ( $P_{adj} < 0.01 / \log^{10} p_{adj}$ ,  $\log_2$ ) upregulated and downregulated genes highlighted in red and  
568 blue respectively in the two comparisons, Psa-TMT vs Psa-Sus and Psa-FT vs Psa-Sus. The grey  
569 dots indicate non-significantly expressed genes, whereas the green dots highlight the genes that  
570 are differentially expressed in common between Psa-TMT vs Psa-Sus and Psa-FT vs Psa-Sus. f)  
571 shows the DE genes in common or unique, respectively, between Psa-TMT vs Psa-Sus and Psa-  
572 FT vs Psa-Sus.

573 Fig. 5. Circos plot of quantitative trait loci (QTLs) for various phenotypes in field and bioassay  
574 as well as RNA-seq data associated with Psa-tolerant and susceptible genotypes, anchored on the  
575 chromosomes of the Red5 genome version 1.69.0. Tracks A and B represent differentially  
576 expressed genes (DEGs) with  $\log_2FC \pm 2$  and above in fully tolerant (Psa-FT) vs susceptible (Psa-  
577 Sus) and tolerant to medium tolerant (PsaTMT) vs Psa-Sus genotypes, respectively. On track A,  
578 blue circles are upregulated and red circles are downregulated genes in Psa-FT compared to Psa-  
579 Sus genotypes. On track B, blue circles are downregulated and red circles are upregulated genes  
580 in Psa-TMT compared to Psa-Sus genotypes. Genes with  $\log_2FC$ , between 1 and -1, are  
581 represented by green circles. Increase in circle diameter indicates increasing  $\log_2FC$  value. Track  
582 C represents DEGs common to Psa-FT and Psa-TMT. Track D and E are LOD values for  
583 Psa\_score\_Field for 'Hort16A' and P1 respectively. The lines change from black to red for a  
584 LOD score  $> 3$ . Track F and G are QTLs detected from all phenotypes listed in QTL key in  
585 'Hort16A' and P1 respectively. H represents the lines connecting QTLs for similar phenotype on  
586 different chromosomes.

587 Fig. 6. Real-time quantitative PCR of relative gene expression of candidate genes in Psa-TMT,  
588 Psa-FT and Psa-Sus genotypes. Expression of the candidate genes was analyzed in Psa-TMT (73,  
589 74, 76), Psa-FT (77, 78, 79) and Psa-Sus (82, 83, 84) genotypes using real-time quantitative  
590 reverse transcription polymerase chain reaction (RT-qRT-PCR). Data represents mean relative  
591 gene expression of the candidate genes, in three to seven clonal replicates for each genotype, to  
592 the mean of *Actin* and *Ubiquitin* genes and plotted using `geom_boxplot`. Asterisks represents  
593 statistically significant differences in the relative expression of the candidate genes in genotypes



594 of Psa-TMT and Psa-FT compared to the mean relative expression of genes in Psa-Sus genotypes  
595 using Student's *t*-test.

596

## 597 **References**

- 598 1 Glazebrook, J. Contrasting Mechanisms of Defense Against Biotrophic and Necrotrophic  
599 Pathogens. *Annual Review of Phytopathology* **43**, 205-227,  
600 doi:10.1146/annurev.phyto.43.040204.135923 (2005).
- 601 2 Serizawa, S., Ichikawa, T., Takikawa, Y., Tsuyumu, S. & Goto, M. Occurrence of bacterial  
602 canker of kiwifruit in Japan: description of symptoms, isolation of the pathogen and  
603 screening of bactericides. *Annals of the Phytopathological Society of Japan* **55**, 427-436,  
604 doi:10.3186/jjphytopath.55.427 (1989).
- 605 3 Takikawa, Y., Serizawa, S., Ichikawa, T., Tsuyumu, S. & Goto, M. *Pseudomonas syringae*  
606 pv. *actinidiae* pv. nov.: the causal bacterium of canker of kiwifruit in Japan. *Annals of the*  
607 *Phytopathological Society of Japan* **55**, 437-444, doi:10.3186/jjphytopath.55.437 (1989).
- 608 4 Vanneste, J. L. The Scientific, Economic, and Social Impacts of the New Zealand  
609 Outbreak of Bacterial Canker of Kiwifruit (*Pseudomonas syringae* pv. *actinidiae*). *Annual*  
610 *Review of Phytopathology* **55**, null, doi:10.1146/annurev-phyto-080516-035530 (2017).
- 611 5 McCann, H. C. *et al.* Origin and Evolution of the Kiwifruit Canker Pandemic. *Genome*  
612 *biology and evolution* **9**, 932-944, doi:10.1093/gbe/evx055 (2017).
- 613 6 Abelleira, A. *et al.* Current situation and characterization of *Pseudomonas syringae* pv.  
614 *actinidiae* on kiwifruit in Galicia (northwest Spain). *Plant Pathology* **63**, 691-699,  
615 doi:doi:10.1111/ppa.12125 (2014).
- 616 7 Chapman, J. R. *et al.* Phylogenetic Relationships Among Global Populations of  
617 *Pseudomonas syringae* pv. *actinidiae*. *Phytopathology* **102**, 1034-1044,  
618 doi:10.1094/PHYTO-03-12-0064-R (2012).
- 619 8 Everett, K. *et al.* *First report of Pseudomonas syringae* pv. *actinidiae* causing kiwifruit  
620 *bacterial canker in New Zealand*. Vol. 6 (2011).
- 621 9 McCann, H. C. *et al.* Genomic Analysis of the Kiwifruit Pathogen *Pseudomonas syringae*  
622 pv. *actinidiae* Provides Insight into the Origins of an Emergent Plant Disease. *PLOS*  
623 *Pathogens* **9**, e1003503, doi:10.1371/journal.ppat.1003503 (2013).
- 624 10 Koh, Y. J., Kim, G. H., Jung, J. S., Lee, Y. S. & Hur, J. S. Outbreak of bacterial canker on  
625 Hort16A (*Actinidia chinensis* Planchon) caused by *Pseudomonas syringae* pv. *actinidiae*  
626 in Korea. *New Zealand Journal of Crop and Horticultural Science* **38**, 275-282,  
627 doi:10.1080/01140671.2010.512624 (2010).
- 628 11 Balestra, G. M., Mazzaglia, A., Quattrucci, A., Renzi, M. & Rossetti, A. Current status of  
629 bacterial canker spread on kiwifruit in Italy. *Australasian Plant Disease Notes* **4**, 34-36,  
630 doi:10.1071/DN09014 (2009).
- 631 12 Cheng, H. *et al.* Pathogen Identification of Kiwifruit Bacterial Canker in Anhui. *Journal of*  
632 *Anhui Agricultural University* **22**, 219-223 (1995).
- 633 13 Liang, Y., Zhang, X., Tian, C., Gao, A. & Wang, P. Pathogenic identification of kiwifruit  
634 bacterial canker in Shaanxi. *Journal of Northwest Forestry College* **15**, 37-39 (2000).

- 635 14 Scortichini, M. Occurrence of *Pseudomonas syringae* pv. *actinidiae* on kiwifruit in Italy.  
636 *Plant Pathology* **43**, 1035-1038, doi:doi:10.1111/j.1365-3059.1994.tb01654.x (1994).
- 637 15 Ushiyama, K. *et al.* Bacterial Canker Disease of Wild Actinidia Plants as the Infection  
638 Source of Outbreak of Bacterial Canker of Kiwifruit Caused by *Pseudomonas syringae* pv.  
639 *actinidiae*. *Japanese Journal of Phytopathology* **58**, 426-430,  
640 doi:10.3186/jjphytopath.58.426 (1992).
- 641 16 Ushiyama, K., Suyama, K., Kita, N., Aono, N. & Fujii, H. Isolation of Kiwifruit Canker  
642 Pathogen, *Pseudomonas syringae* pv. *actinidiae* from Leaf Spot of Tara Vine (*Actinidia*  
643 *arguta* Planch.). *Japanese Journal of Phytopathology* **58**, 476-479,  
644 doi:10.3186/jjphytopath.58.476 (1992).
- 645 17 Fang, Y., Zhu, X. & Wang, Y. Preliminary studies on kiwifruit diseases in Hunan Province.  
646 *Sichuan Fruit Science and Technoogy*. **18**, 28–29 (1990).
- 647 18 Vanneste, J. L. *et al.* Identification, Virulence, and Distribution of Two Biovars of  
648 *Pseudomonas syringae* pv. *actinidiae* in New Zealand. *Plant Disease* **97**, 708-719,  
649 doi:10.1094/Pdis-07-12-0700-Re (2013).
- 650 19 Koh, Y. Outbreak and spread of bacterial canker in kiwifruit. *Korean. J. Plant Pathol.* **10**,  
651 68-72 (1994).
- 652 20 Marcelletti, S., Ferrante, P., Petriccione, M., Firrao, G. & Scortichini, M. *Pseudomonas*  
653 *syringae* pv. *actinidiae* Draft Genomes Comparison Reveal Strain-Specific Features  
654 Involved in Adaptation and Virulence to Actinidia Species. *PLOS ONE* **6**, e27297,  
655 doi:10.1371/journal.pone.0027297 (2011).
- 656 21 Mazzaglia, A. *et al.* *Pseudomonas syringae* pv. *actinidiae* (PSA) Isolates from Recent  
657 Bacterial Canker of Kiwifruit Outbreaks Belong to the Same Genetic Lineage. *PLOS ONE*  
658 **7**, e36518, doi:10.1371/journal.pone.0036518 (2012).
- 659 22 Scortichini, M., Marcelletti, S., Ferrante, P., Petriccione, M. & Firrao, G. *Pseudomonas*  
660 *syringae* pv. *actinidiae*: a re-emerging, multi-faceted, pandemic pathogen. *Molecular*  
661 *Plant Pathology* **13**, 631-640, doi:doi:10.1111/j.1364-3703.2012.00788.x (2012).
- 662 23 Vanneste, J. L. *Pseudomonas syringae* pv. *actinidiae* (Psa): a threat to the New Zealand  
663 and global kiwifruit industry. *New Zealand Journal of Crop and Horticultural Science* **40**,  
664 265-267, doi:10.1080/01140671.2012.736084 (2012).
- 665 24 Vanneste, J. L. 1095 edn 21-23 (International Society for Horticultural Science (ISHS),  
666 Leuven, Belgium).
- 667 25 De Silva, N. H., Gea, L. & Lowe, R. Genetic analysis of resistance to *Pseudomonas*  
668 *syringae* pv. *actinidiae* (Psa) in a kiwifruit progeny test: an application of generalised  
669 linear mixed models (GLMMs). *SpringerPlus* **3**, 547-547, doi:10.1186/2193-1801-3-547  
670 (2014).
- 671 26 Hoyte, S. *et al.* Developing and Using Bioassays to Screen for Psa Resistance in New  
672 Zealand Kiwifruit. *Acta Hort* **1095**, 171-180 (2015).
- 673 27 Datson, P. *et al.* MONITORING THE ACTINIDIA GERMLASM FOR RESISTANCE TO  
674 *PSEUDOMONAS SYRINGAE* PV. *ACTINIDIAE*. (2015).
- 675 28 Tahir, J. *et al.* Tolerance to *Pseudomonas syringae* pv. *actinidiae* in a kiwifruit breeding  
676 parent is conferred by multiple loci. (2018).

- 677 29 Ishiga, Y., Ishiga, T., Uppalapati, S. R. & Mysore, K. S. Arabidopsis seedling flood-  
678 inoculation technique: a rapid and reliable assay for studying plant-bacterial  
679 interactions. *Plant Methods* **7**, 32, doi:10.1186/1746-4811-7-32 (2011).
- 680 30 Elshire, R. J. *et al.* A Robust, Simple Genotyping-by-Sequencing (GBS) Approach for High  
681 Diversity Species. *PLOS ONE* **6**, e19379, doi:10.1371/journal.pone.0019379 (2011).
- 682 31 Crowhurst, R., Pilkington, S. & McCallum, J. Kiwifruit Genome Assembly Red5 Version  
683 PS1.68.5. *10.5281/zenodo.1297304*, doi:10.5281/zenodo.1297304 (2018).
- 684 32 Huang, S. *et al.* Draft genome of the kiwifruit *Actinidia chinensis*. *Nature*  
685 *Communications* **4**, 2640, doi:10.1038/ncomms3640
- 686 <https://www.nature.com/articles/ncomms3640#supplementary-information> (2013).
- 687 33 Pilkington, S. M. *et al.* A manually annotated *Actinidia chinensis* var. *chinensis* (kiwifruit)  
688 genome highlights the challenges associated with draft genomes and gene prediction in  
689 plants. *BMC Genomics* **19**, 257, doi:10.1186/s12864-018-4656-3 (2018).
- 690 34 Fraser, L. G. *et al.* Characterisation, evolutionary trends and mapping of putative  
691 resistance and defence genes in *Actinidia* (kiwifruit). *Tree Genetics & Genomes* **11**, 21,  
692 doi:10.1007/s11295-015-0846-1 (2015).
- 693 35 Rant, J. C., Arraiano, L. S., Chabannes, M. & Brown, J. K. M. Quantitative trait loci for  
694 partial resistance to *Pseudomonas syringae* pv. *maculicola* in *Arabidopsis thaliana*.  
695 *Molecular Plant Pathology* **14**, 828-837, doi:10.1111/mpp.12043 (2013).
- 696 36 Luo, Q., Liu, W.-W., Pan, K.-D., Peng, Y.-L. & Fan, J. Genetic Interaction between  
697 *Arabidopsis* Qpm3.1 Locus and Bacterial Effector Gene *hopW1-1* Underlies Natural  
698 Variation in Quantitative Disease Resistance to *Pseudomonas* Infection. *Frontiers in*  
699 *Plant Science* **8**, 695, doi:10.3389/fpls.2017.00695 (2017).
- 700 37 Perchepped, L., Kroj, T., Tronchet, M., Loudet, O. & Roby, D. Natural Variation in Partial  
701 Resistance to *Pseudomonas syringae* Is Controlled by Two Major QTLs in *Arabidopsis*  
702 *thaliana*. *PLOS ONE* **1**, e123, doi:10.1371/journal.pone.0000123 (2006).
- 703 38 González, A., Godoy, L. & Santalla, M. Dissection of Resistance Genes to *Pseudomonas*  
704 *syringae* pv. *phaseolicola* in UI3 Common Bean Cultivar. *International Journal of*  
705 *Molecular Sciences* **18**, 2503 (2017).
- 706 39 Johnson, R. A Critical Analysis of Durable Resistance. *Annual Review of Phytopathology*  
707 **22**, 309-330, doi:10.1146/annurev.py.22.090184.001521 (1984).
- 708 40 Pilet-Nayel, M.-L. *et al.* Quantitative Resistance to Plant Pathogens in Pyramiding  
709 Strategies for Durable Crop Protection. *Frontiers in Plant Science* **8**, 1838,  
710 doi:10.3389/fpls.2017.01838 (2017).
- 711 41 Corwin, J. A. & Kliebenstein, D. J. Quantitative Resistance: More Than Just Perception of  
712 a Pathogen. *The Plant Cell* **29**, 655-665, doi:10.1105/tpc.16.00915 (2017).
- 713 42 Bus, V. G. M., Esmenjaud, D., Buck, E. & Laurens, F. in *Genetics and Genomics of*  
714 *Rosaceae* (eds Kevin M. Folta & Susan E. Gardiner) 563-599 (Springer New York, 2009).
- 715 43 Dirlewanger, E. *et al.* Comparative mapping and marker-assisted selection in Rosaceae  
716 fruit crops. *Proceedings of the National Academy of Sciences of the United States of*  
717 *America* **101**, 9891-9896, doi:10.1073/pnas.0307937101 (2004).
- 718 44 Ru, S., Main, D., Evans, K. & Peace, C. Current applications, challenges, and perspectives  
719 of marker-assisted seedling selection in Rosaceae tree fruit breeding. *Tree Genetics &*  
720 *Genomes* **11**, 8, doi:10.1007/s11295-015-0834-5 (2015).

- 721 45 van Nocker, S. & Gardiner, S. E. Breeding better cultivars, faster: applications of new  
722 technologies for the rapid deployment of superior horticultural tree crops. *Horticulture*  
723 *Research* **1**, 14022, doi:10.1038/hortres.2014.22 (2014).
- 724 46 Brown, J. K. M. Durable Resistance of Crops to Disease: A Darwinian Perspective. *Annual*  
725 *Review of Phytopathology* **53**, 513-539, doi:10.1146/annurev-phyto-102313-045914  
726 (2015).
- 727 47 Parlevliet, J. E. Durability of resistance against fungal, bacterial and viral pathogens;  
728 present situation. *Euphytica* **124**, 147-156, doi:10.1023/A:1015601731446 (2002).
- 729 48 Brun, H. *et al.* Quantitative resistance increases the durability of qualitative resistance to  
730 *Leptosphaeria maculans* in *Brassica napus*. *New Phytologist* **185**, 285-299,  
731 doi:doi:10.1111/j.1469-8137.2009.03049.x (2010).
- 732 49 Cheng, C. H. Inheritance of resistance to *Pseudomonas syringae* pv. *actinidiae* and  
733 genetic correlations with fruit characters in a diploid *Actinidia chinensis* (kiwifruit)  
734 population. *Euphytica* **198**, 305-315 (2014).
- 735 50 Xin, X.-F., Kvitko, B. & He, S. Y. *Pseudomonas syringae*: what it takes to be a pathogen.  
736 *Nature Reviews Microbiology* **16**, 316, doi:10.1038/nrmicro.2018.17 (2018).
- 737 51 Kennelly, M. M., Cazorla, F. M., de Vicente, A., Ramos, C. & Sundin, G. W. *Pseudomonas*  
738 *syringae* Diseases of Fruit Trees: Progress Toward Understanding and Control. *Plant*  
739 *Disease* **91**, 4-17, doi:10.1094/PD-91-0004 (2007).
- 740 52 Wu, J. *et al.* Identification of QTLs for Resistance to *Sclerotinia* Stem Rot and  
741 *BnaC.IGMT5.a* as a Candidate Gene of the Major Resistant QTL SRC6 in *Brassica napus*.  
742 *PLOS ONE* **8**, e67740, doi:10.1371/journal.pone.0067740 (2013).
- 743 53 Wang, Y., Bao, Z., Zhu, Y. & Hua, J. Analysis of Temperature Modulation of Plant Defense  
744 Against Biotrophic Microbes. *Molecular Plant-Microbe Interactions* **22**, 498-506,  
745 doi:10.1094/MPMI-22-5-0498 (2009).
- 746 54 Huot, B. *et al.* Dual impact of elevated temperature on plant defence and bacterial  
747 virulence in *Arabidopsis*. *Nature Communications* **8**, 1808, doi:10.1038/s41467-017-  
748 01674-2 (2017).
- 749 55 Serizawa, S. & Ichikawa, T. Epidemiology of bacterial canker of kiwifruit. 4. Optimum  
750 temperature for disease development on new canes. *Annals of the Phytopathological*  
751 *Society of Japan* **59**, 694-701, doi:10.3186/jjphytopath.59.694 (1993).
- 752 56 Monier, J.-M. & Lindow, S. E. Frequency, Size, and Localization of Bacterial Aggregates  
753 on Bean Leaf Surfaces. *Applied and Environmental Microbiology* **70**, 346-355,  
754 doi:10.1128/aem.70.1.346-355.2004 (2004).
- 755 57 Vanneste, J. L., Reglinski, T., Yu, J. & Cornish, D. A. 1095 edn 117-122 (International  
756 Society for Horticultural Science (ISHS), Leuven, Belgium).
- 757 58 Xin, X.-F. *et al.* Bacteria establish an aqueous living space in plants crucial for virulence.  
758 *Nature* **539**, 524, doi:10.1038/nature20166
- 759 <https://www.nature.com/articles/nature20166#supplementary-information> (2016).
- 760 59 Panchal, S. *et al.* Regulation of Stomatal Defense by Air Relative Humidity. *Plant*  
761 *Physiology* **172**, 2021-2032, doi:10.1104/pp.16.00696 (2016).
- 762 60 Cellini, A. *et al.* Elicitors of the salicylic acid pathway reduce incidence of bacterial canker  
763 of kiwifruit caused by *Pseudomonas syringae* pv. *actinidiae*. *Annals of Applied Biology*  
764 **165**, 441-453, doi:doi:10.1111/aab.12150 (2014).

- 765 61 Scholthof, K.-B. G. The disease triangle: pathogens, the environment and society. *Nature*  
766 *Reviews Microbiology* **5**, 152, doi:10.1038/nrmicro1596 (2006).
- 767 62 Palloix, A., Ayme, V. & Moury, B. Durability of plant major resistance genes to pathogens  
768 depends on the genetic background, experimental evidence and consequences for  
769 breeding strategies. *New Phytologist* **183**, 190-199, doi:doi:10.1111/j.1469-  
770 8137.2009.02827.x (2009).
- 771 63 Michelotti, V. *et al.* Comparative transcriptome analysis of the interaction between  
772 *Actinidia chinensis* var. *chinensis* and *Pseudomonas syringae* pv. *actinidiae* in absence  
773 and presence of acibenzolar-S-methyl. *BMC Genomics* **19**, 585, doi:10.1186/s12864-018-  
774 4967-4 (2018).
- 775 64 Wang, T. *et al.* Transcriptome Analysis of Kiwifruit in Response to *Pseudomonas syringae*  
776 pv. *actinidiae* Infection. *International Journal of Molecular Sciences* **19**, 373,  
777 doi:10.3390/ijms19020373 (2018).
- 778 65 Wang, Z. *et al.* Whole transcriptome sequencing of *Pseudomonas syringae* pv.  
779 *actinidiae*-infected kiwifruit plants reveals species-specific interaction between long  
780 non-coding RNA and coding genes. *Scientific Reports* **7**, 4910, doi:10.1038/s41598-017-  
781 05377-y (2017).
- 782 66 Chen, X., Steed, A., Travella, S., Keller, B. & Nicholson, P. *Fusarium graminearum* exploits  
783 ethylene signalling to colonize dicotyledonous and monocotyledonous plants. *New*  
784 *Phytologist* **182**, 975-983, doi:doi:10.1111/j.1469-8137.2009.02821.x (2009).
- 785 67 Eulgem, T. *et al.* EDM2 is required for RPP7-dependent disease resistance in *Arabidopsis*  
786 and affects RPP7 transcript levels. *The Plant Journal* **49**, 829-839,  
787 doi:doi:10.1111/j.1365-313X.2006.02999.x (2007).
- 788 68 Langenbach, C., Campe, R., Schaffrath, U., Goellner, K. & Conrath, U. UDP-  
789 glucosyltransferase UGT84A2/BRT1 is required for *Arabidopsis* nonhost resistance to the  
790 Asian soybean rust pathogen *Phakopsora pachyrhizi*. *New Phytologist* **198**, 536-545,  
791 doi:doi:10.1111/nph.12155 (2013).
- 792 69 Martinelli, F., Reagan, R. L., Dolan, D., Fileccia, V. & Dandekar, A. M. Proteomic analysis  
793 highlights the role of detoxification pathways in increased tolerance to Huanglongbing  
794 disease. *BMC Plant Biology* **16**, 167, doi:10.1186/s12870-016-0858-5 (2016).
- 795 70 Zhang, H. *et al.* MADS1, a novel MADS-box protein, is involved in the response of  
796 *Nicotiana benthamiana* to bacterial harpinXoo. *Journal of Experimental Botany* **67**, 131-  
797 141, doi:10.1093/jxb/erv448 (2016).
- 798 71 Singh, B. & Sharma, R. A. Plant terpenes: defense responses, phylogenetic analysis,  
799 regulation and clinical applications. *3 Biotech* **5**, 129-151, doi:10.1007/s13205-014-0220-  
800 2 (2015).
- 801 72 Jones, A. M. E., Thomas, V., Bennett, M. H., Mansfield, J. & Grant, M. Modifications to  
802 the *Arabidopsis* Defense Proteome Occur Prior to Significant Transcriptional Change in  
803 Response to Inoculation with *Pseudomonas syringae*. *Plant Physiology* **142**,  
804 1603-1620, doi:10.1104/pp.106.086231 (2006).
- 805 73 Li, Y.-B. *et al.* The Thioredoxin GbNRX1 Plays a Crucial Role in Homeostasis of Apoplastic  
806 Reactive Oxygen Species in Response to *Verticillium dahliae* Infection in Cotton. *Plant*  
807 *Physiology* **170**, 2392-2406, doi:10.1104/pp.15.01930 (2016).

- 808 74 Blum, M. *et al.* Mandipropamid targets the cellulose synthase-like PiCesA3 to inhibit cell  
809 wall biosynthesis in the oomycete plant pathogen, *Phytophthora infestans*. *Molecular*  
810 *Plant Pathology* **11**, 227-243, doi:doi:10.1111/j.1364-3703.2009.00604.x (2010).
- 811 75 Miller, J. C., Chezem, W. R. & Clay, N. K. Ternary WD40 Repeat-Containing Protein  
812 Complexes: Evolution, Composition and Roles in Plant Immunity. *Frontiers in Plant*  
813 *Science* **6**, 1108, doi:10.3389/fpls.2015.01108 (2015).
- 814 76 Demkura, P. V. & Ballaré, C. L. UVR8 Mediates UV-B-Induced Arabidopsis Defense  
815 Responses against *Botrytis cinerea* by Controlling Sinapate Accumulation. *Molecular*  
816 *Plant* **5**, 642-652, doi:<https://doi.org/10.1093/mp/sss025> (2012).
- 817 77 Li, T. *et al.* Wheat Ammonium Transporter (AMT) Gene Family: Diversity and Possible  
818 Role in Host–Pathogen Interaction with Stem Rust. *Frontiers in Plant Science* **8**,  
819 doi:10.3389/fpls.2017.01637 (2017).
- 820 78 Guarna, M. M. *et al.* Peptide biomarkers used for the selective breeding of a complex  
821 polygenic trait in honey bees. *Scientific Reports* **7**, 8381, doi:10.1038/s41598-017-08464-  
822 2 (2017).
- 823 79 Hwang, M. S. H., Morgan, R. L., Sarkar, S. F., Wang, P. W. & Guttman, D. S. Phylogenetic  
824 Characterization of Virulence and Resistance Phenotypes of *Pseudomonas*  
825 *syringae*. *Applied and Environmental Microbiology* **71**, 5182-5191,  
826 doi:10.1128/aem.71.9.5182-5191.2005 (2005).
- 827 80 Baltrus, D. A., McCann, H. C. & Guttman, D. S. Evolution, genomics and epidemiology of  
828 *Pseudomonas syringae*. *Molecular Plant Pathology* **18**, 152-168,  
829 doi:doi:10.1111/mpp.12506 (2017).
- 830 81 Tyson, J. L., Vergara, M. J., Butler, R. C., Seelye, J. F. & Morgan, E. R. Survival, growth and  
831 detection of *Pseudomonas syringae* pv. *actinidiae* in *Actinidia* in vitro cultures. *New*  
832 *Zealand Journal of Crop and Horticultural Science* **46**, 319-333,  
833 doi:10.1080/01140671.2017.1414064 (2018).
- 834 82 Vanneste, J. L., Moffat, B. J. & Oldham, J. M. Survival of *Pseudomonas syringae* pv.  
835 *actinidiae* on *Cryptomeria japonica*, a non-host plant used as shelter belts in kiwifruit  
836 orchards. *New Zealand Plant Protection* **65**, 1-7 (2012).
- 837 83 Vanneste, J. L. *et al.* 1095 edn 105-110 (International Society for Horticultural Science  
838 (ISHS), Leuven, Belgium).
- 839 84 Doyle, J. & Doyle, J. Genomic plant DNA preparation from fresh tissue-CTAB method.  
840 *Phytochem Bull* **19**, 11-15 (1987).
- 841 85 Kumar, S. *et al.* Genotyping-by-sequencing of pear (*Pyrus* spp.) accessions unravels  
842 novel patterns of genetic diversity and selection footprints. *Horticulture Research* **4**,  
843 17015, doi:10.1038/hortres.2017.15
- 844 <https://www.nature.com/articles/hortres201715#supplementary-information> (2017).
- 845 86 Van Ooijen, J. W. & Voorrips, R. JoinMap® 3.0, Software for the calculation of genetic  
846 linkage maps. *Plant Research International, Wageningen, The Netherlands*, 1-51 (2001).
- 847 87 Broman, K. W., Wu, H., Sen, S. & Churchill, G. A. R/qtl: QTL mapping in experimental  
848 crosses. *Bioinformatics* **19**, 889-890, doi:10.1093/bioinformatics/btg112 (2003).
- 849 88 Van Ooijen, J. MapQTL® 5, Software for the mapping of quantitative trait loci in  
850 experimental populations. *Kyazma BV, Wageningen* **63** (2004).



- 851 89 Bolger, A. M., Lohse, M. & Usadel, B. Trimmomatic: a flexible trimmer for Illumina  
852 sequence data. *Bioinformatics* **30**, 2114-2120 (2014).
- 853 90 Kopylova, E., Noé, L. & Touzet, H. SortMeRNA: fast and accurate filtering of ribosomal  
854 RNAs in metatranscriptomic data. *Bioinformatics* **28**, 3211-3217 (2012).
- 855 91 Love, M. I., Huber, W. & Anders, S. Moderated estimation of fold change and dispersion  
856 for RNA-seq data with DESeq2. *Genome biology* **15**, 550 (2014).
- 857 92 Pfaffl, M. W. A new mathematical model for relative quantification in real-time RT-PCR.  
858 *Nucleic acids research* **29**, e45-e45 (2001).
- 859 93 Hayden, M. J., Nguyen, T. M., Waterman, A. & Chalmers, K. J. Multiplex-ready PCR: a  
860 new method for multiplexed SSR and SNP genotyping. *BMC genomics* **9**, 80-80,  
861 doi:10.1186/1471-2164-9-80 (2008).
- 862 94 Guitton, B. *et al.* Genetic control of biennial bearing in apple. *Journal of Experimental*  
863 *Botany* **63**, 131-149, doi:10.1093/jxb/err261 (2012).

864

865

866

867

868

869

870

871

872

873

874

875

876

877

878

879

880

881

882

883

884

|  | <b>Gene Ontology and function</b> | <i>Actinidia</i> gene ID | <i>Arabidopsis</i> orthologue |
|--|-----------------------------------|--------------------------|-------------------------------|
|--|-----------------------------------|--------------------------|-------------------------------|

885

886

887

888 **Table 1. Candidates from differentially expressed genes in field tolerant genotypes.** Psa-  
889 tolerant plants (FT), Psa Tolerant to Medium Tolerant /Psa-TMT and Psa-susceptible genotypes  
890 (Psa-Sus).

|                                    |                                                                              |                                                                                                                                                                                                                                                |                                                                                                                                  |
|------------------------------------|------------------------------------------------------------------------------|------------------------------------------------------------------------------------------------------------------------------------------------------------------------------------------------------------------------------------------------|----------------------------------------------------------------------------------------------------------------------------------|
| <b>Upregulated in TMT and FT</b>   | MATE efflux family protein, Protein detoxification                           | Acc00747.1                                                                                                                                                                                                                                     | AT5G52450.1/ <i>DTX16</i>                                                                                                        |
|                                    | <i>MADS</i> -box                                                             | Acc03527.1                                                                                                                                                                                                                                     | AT5G62165.2/ <i>AGL42</i>                                                                                                        |
|                                    | Terpene synthases                                                            | Acc13740.1, Acc13742.1, Acc22685.1, Acc22685.1                                                                                                                                                                                                 | AT5G23960.2/ <i>TPS21</i>                                                                                                        |
|                                    | Major Latex Protein (MLP)-like protein                                       | Acc18987.1, Acc13742.1                                                                                                                                                                                                                         | AT1G24020.1/ <i>MLP28</i>                                                                                                        |
|                                    | Thioredoxin-like protein                                                     | Acc20584.1, Acc20586.1                                                                                                                                                                                                                         | AT1G11530.1/ <i>CXXS1</i>                                                                                                        |
|                                    | Cellulose synthase-like protein                                              | Acc27502.1, Acc15562.1                                                                                                                                                                                                                         | AT4G24010.1/ <i>CSLG1</i>                                                                                                        |
|                                    | <i>UDP-glycosyltransferase</i>                                               | Acc30767.1                                                                                                                                                                                                                                     | AT3G02100.1/ <i>UGT72B1</i>                                                                                                      |
|                                    | WD40-repeat containing super-family protein                                  | Acc23960.1                                                                                                                                                                                                                                     | AT1G78070.1                                                                                                                      |
|                                    | Protein of unknown function, UV-B-induced protein, <i>DUF760</i>             | Acc25706.1, Acc14728.1                                                                                                                                                                                                                         | AT3G07310.1                                                                                                                      |
|                                    | Protein of unknown function, <i>DUF247</i>                                   | Acc08761.1                                                                                                                                                                                                                                     | AT4G31980.1                                                                                                                      |
|                                    | Ammonium transporter                                                         | Acc08664.1                                                                                                                                                                                                                                     | AT2G38290.1/ <i>AMT2</i>                                                                                                         |
|                                    | <i>Chloroplastic, 3-ketoacyl-acyl carrier protein synthase</i>               | Acc08233.1                                                                                                                                                                                                                                     | AT1G24360.1/ <i>KASI</i>                                                                                                         |
|                                    | <i>Alpha-glucan phosphorylase</i>                                            | Acc16485.1                                                                                                                                                                                                                                     | AT3G46970.1                                                                                                                      |
| <b>Downregulated in TMT and FT</b> | <i>Histone superfamily protein, Histone H2A, Chromatin assembly factor-1</i> | Acc15097.1, Acc15099.1, Acc17300.1, Acc16944.1, Acc17279.1, Acc20675.1, Acc20918.1, Acc21661.1, Acc25126.1, Acc25392.1, Acc25885.1, Acc26149.1, Acc26150.1, Acc26360.1, Acc27699.1, Acc30085.1, Acc30211.1, Acc30253.1, Acc31646.1, Acc32318.1 | AT1G09200.1, AT1G65470.1, AT1G65470.1, AT2G28720.1, AT4G27230.1, AT5G59910.1, AT5G02560.1, AT3G45930.1, AT5G22650.2, AT1G54690.1 |
|                                    | <i>Salicylate carboxymethyltransferase</i>                                   | Acc01014.1                                                                                                                                                                                                                                     | AT1G19640.1                                                                                                                      |
|                                    | Auxin efflux carrier family protein                                          | Acc24057.1                                                                                                                                                                                                                                     | AT1G77110.1                                                                                                                      |
|                                    | Acyl-CoA N-acyltransferases (NAT) superfamily protein                        | Acc04255.1                                                                                                                                                                                                                                     | AT2G32030.1                                                                                                                      |
|                                    | Serine/threonine-protein kinase PBS1-like                                    | Acc17448.1                                                                                                                                                                                                                                     | AT3G20530.1                                                                                                                      |
|                                    | Pathogenesis-related thaumatin superfamily protein                           | Acc25881.1                                                                                                                                                                                                                                     | AT2G28790.1                                                                                                                      |

891

892

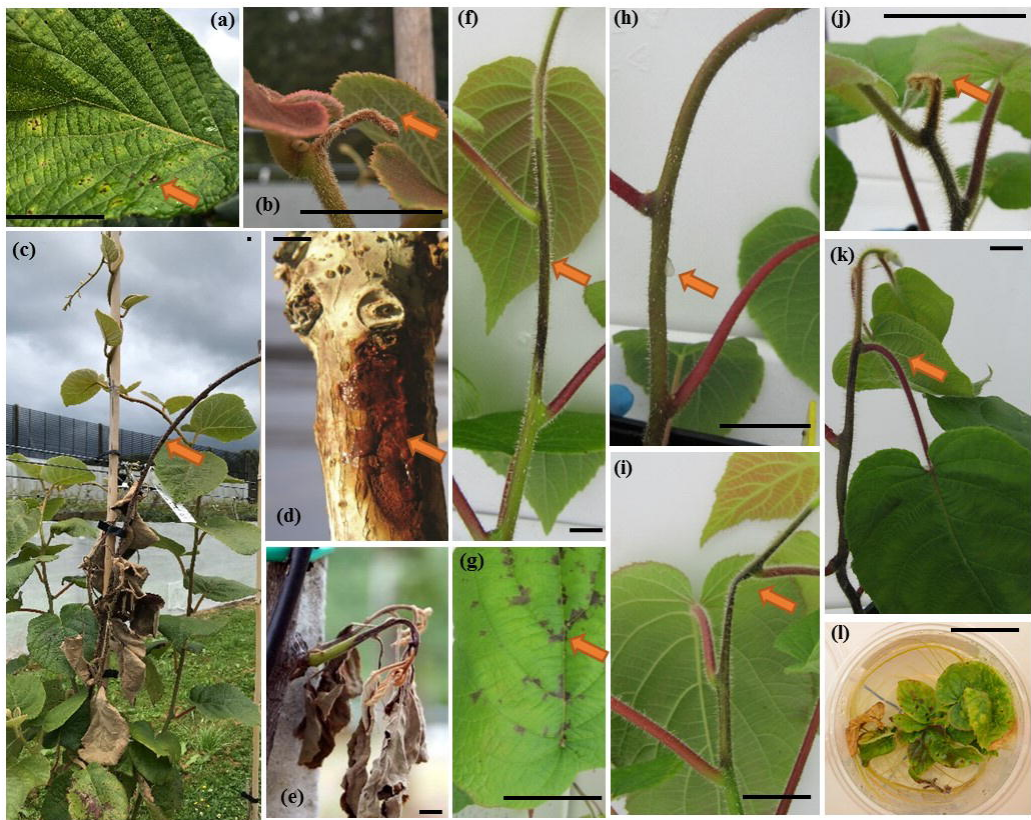

Figure 1

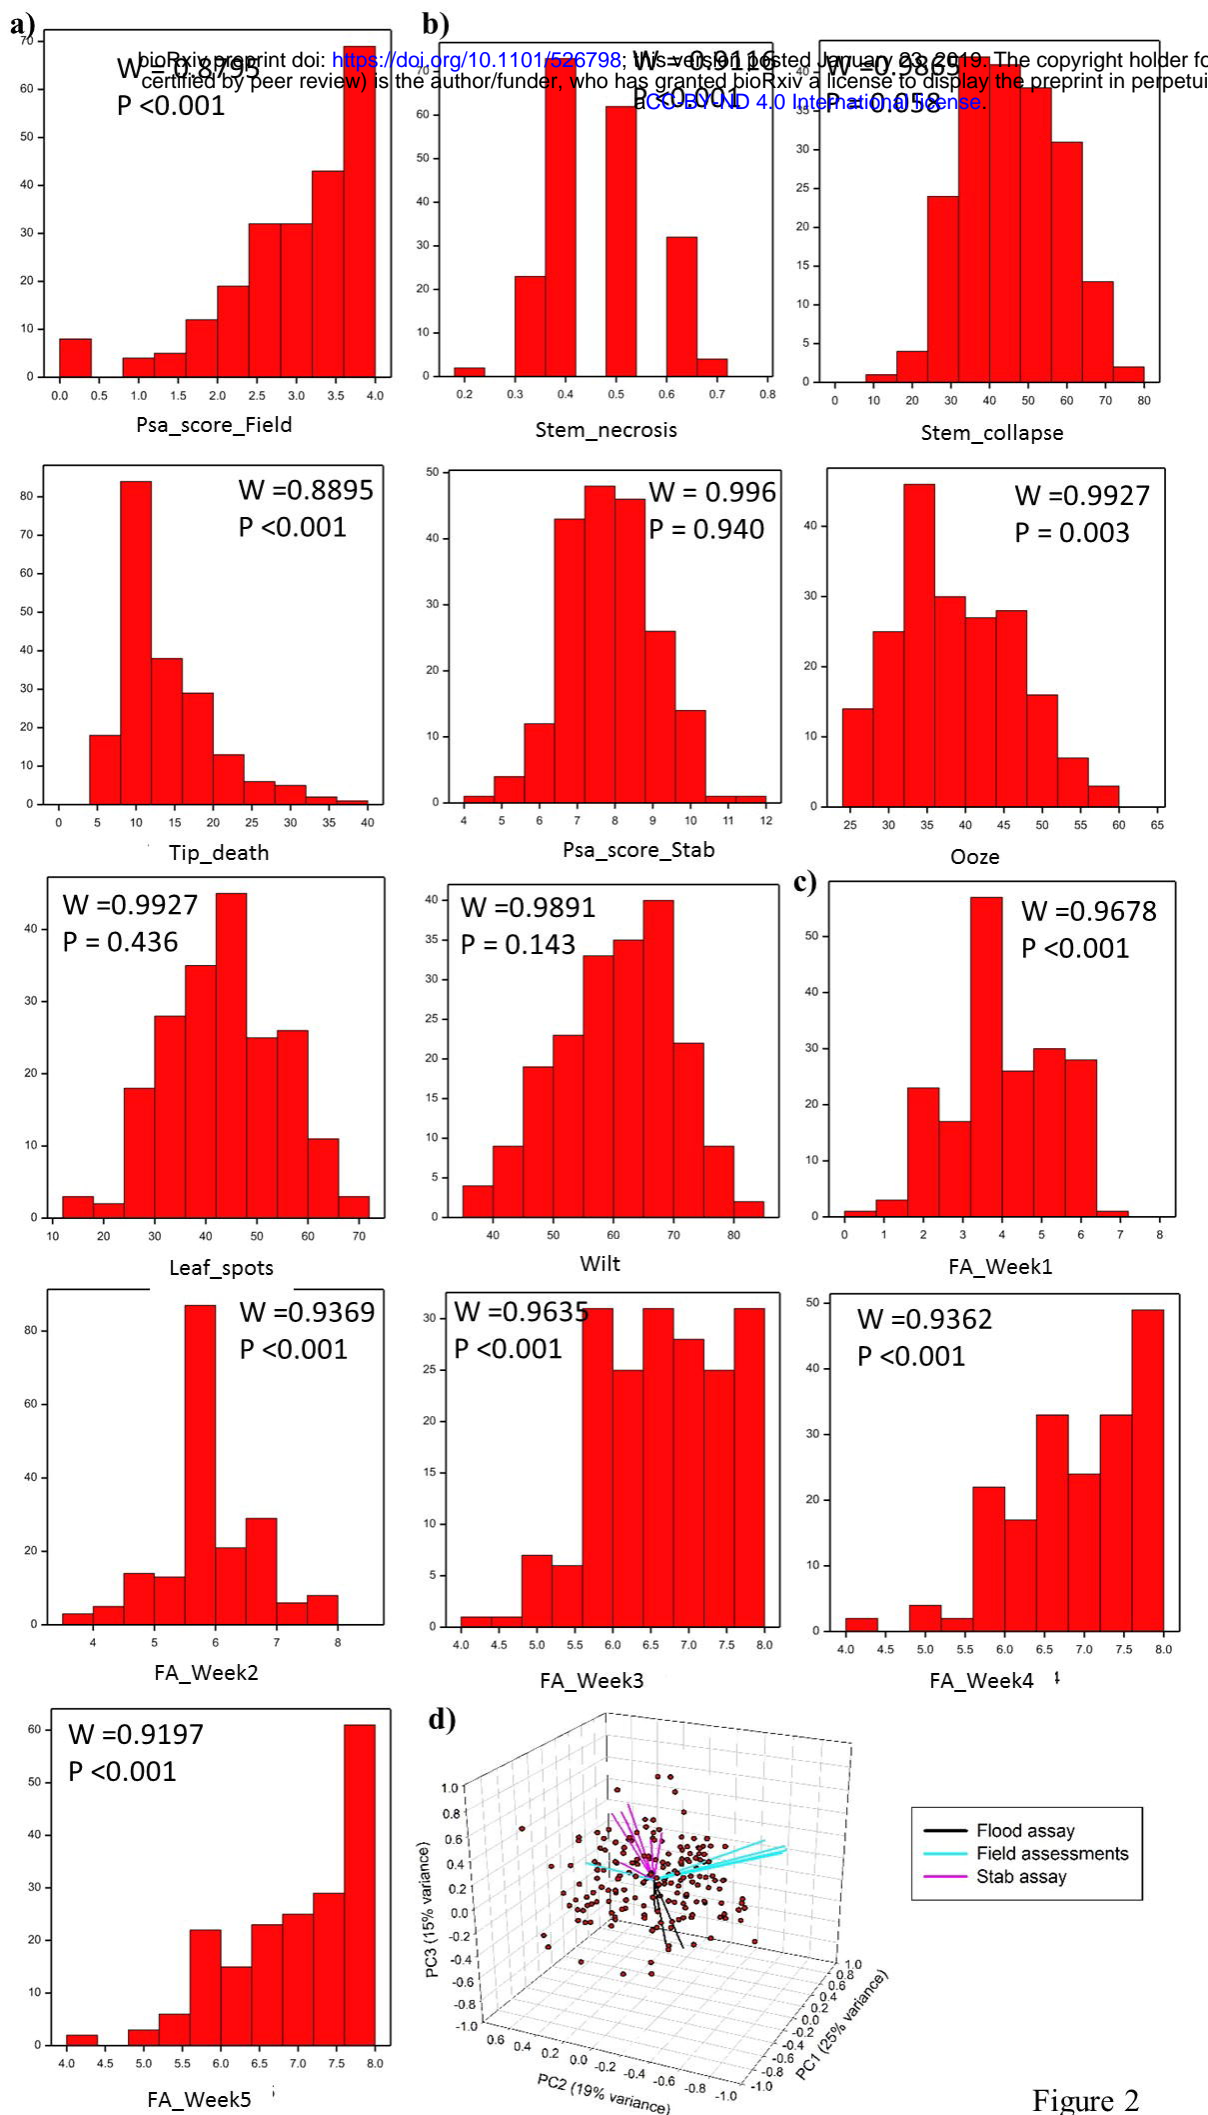

Figure 2

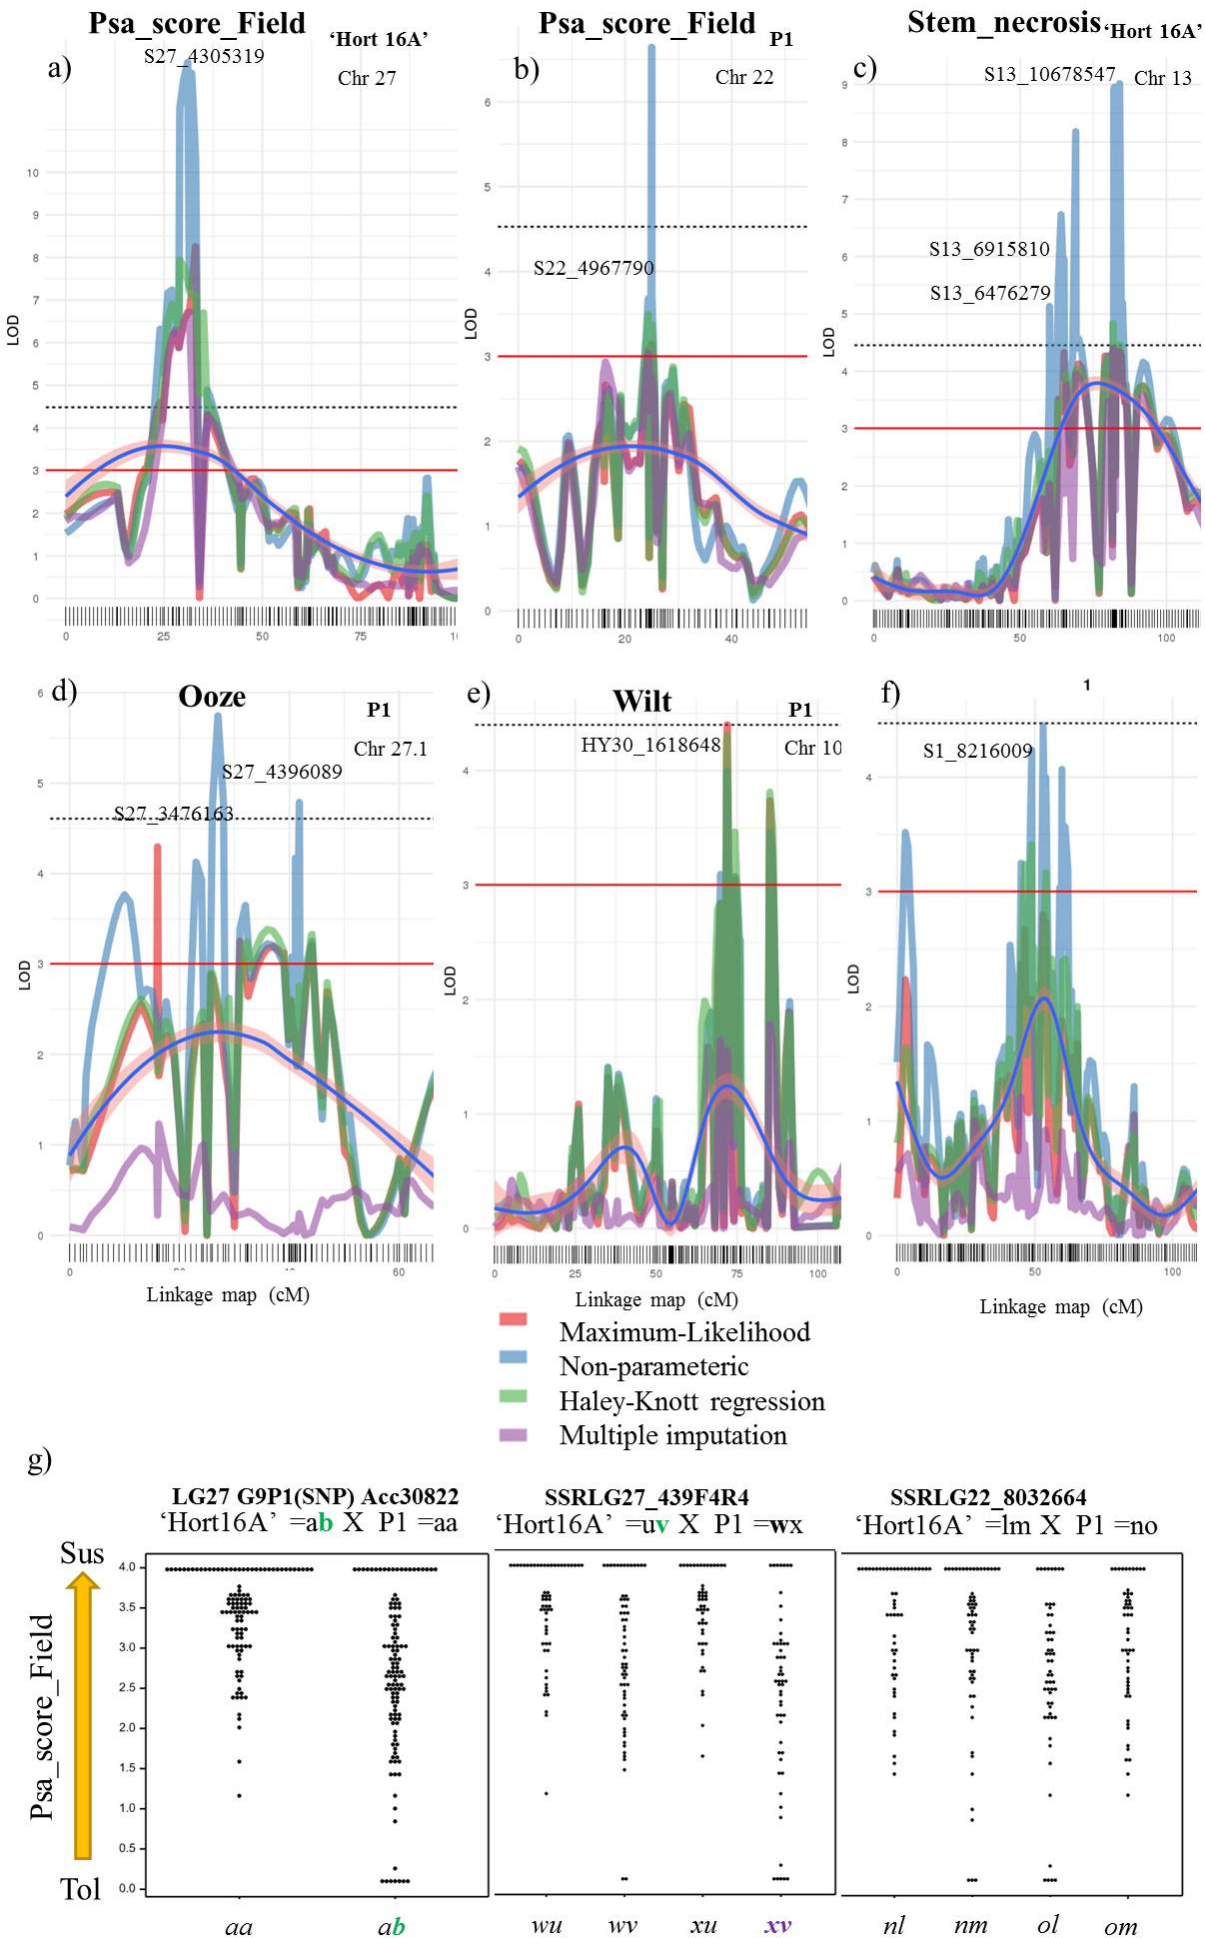

Figure 3



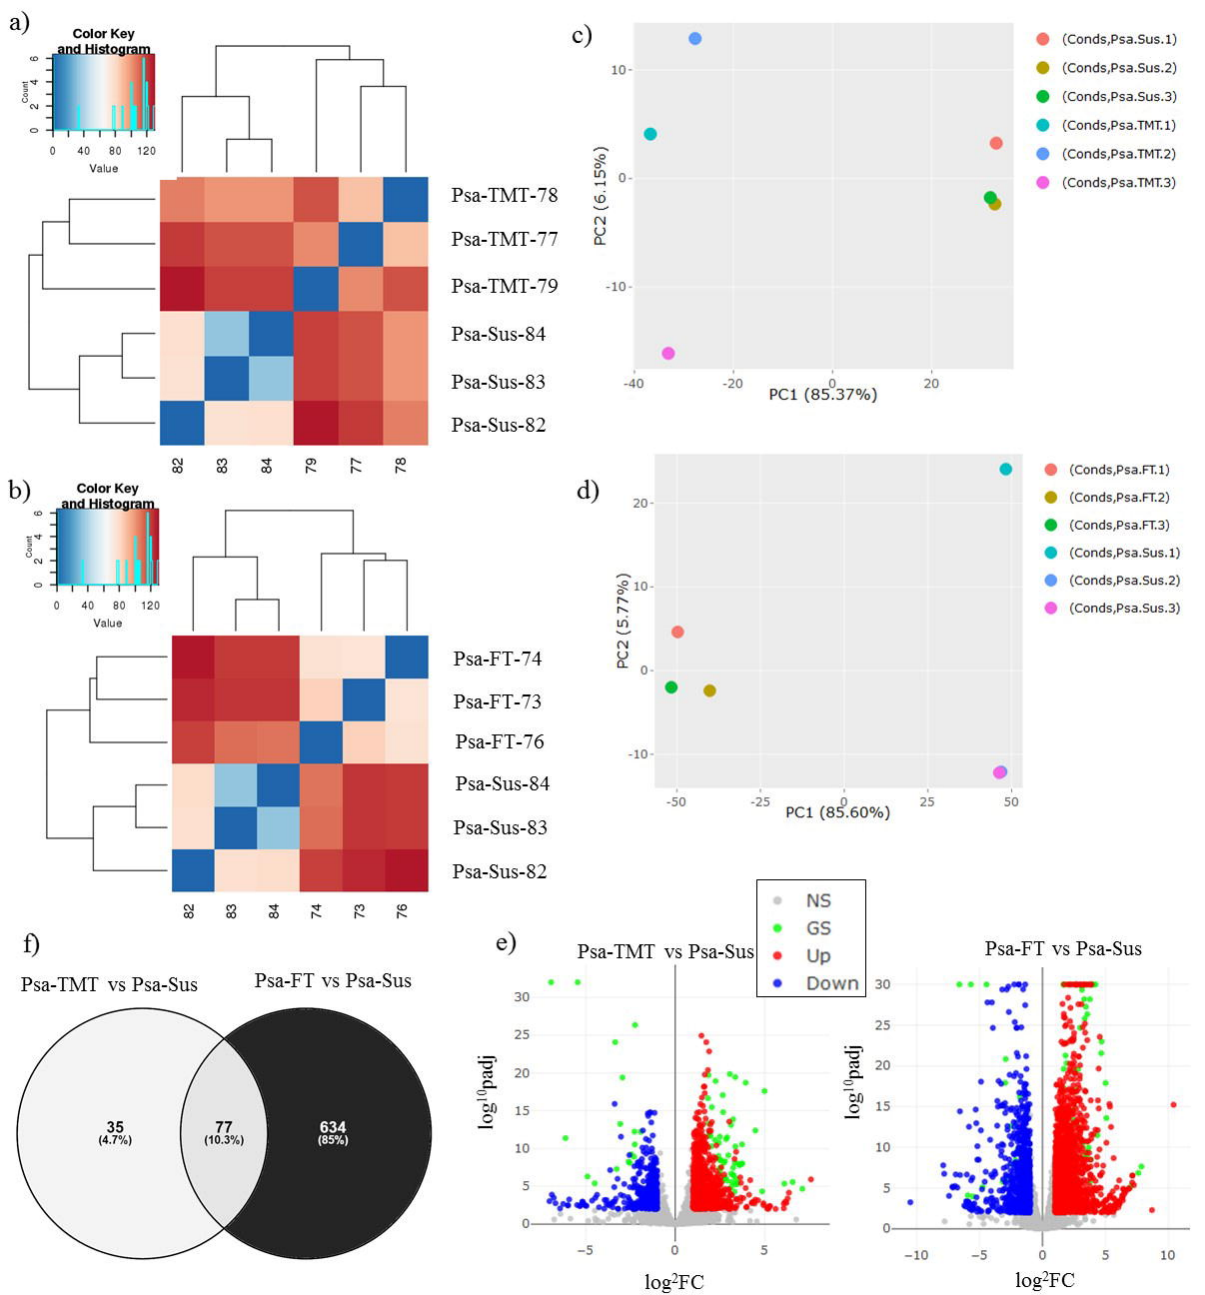

Figure 4



- QTL Key**  
**(tracks F, G, H):**
- Leaf spots
  - Ooze
  - Psa score Field
  - Psa score Stab
  - Stem collapse
  - Stem necrosis
  - Tip death
  - Wilt
  - FA Week1
  - FA Week2
  - FA Week3
  - FA Week4
  - FA Week5

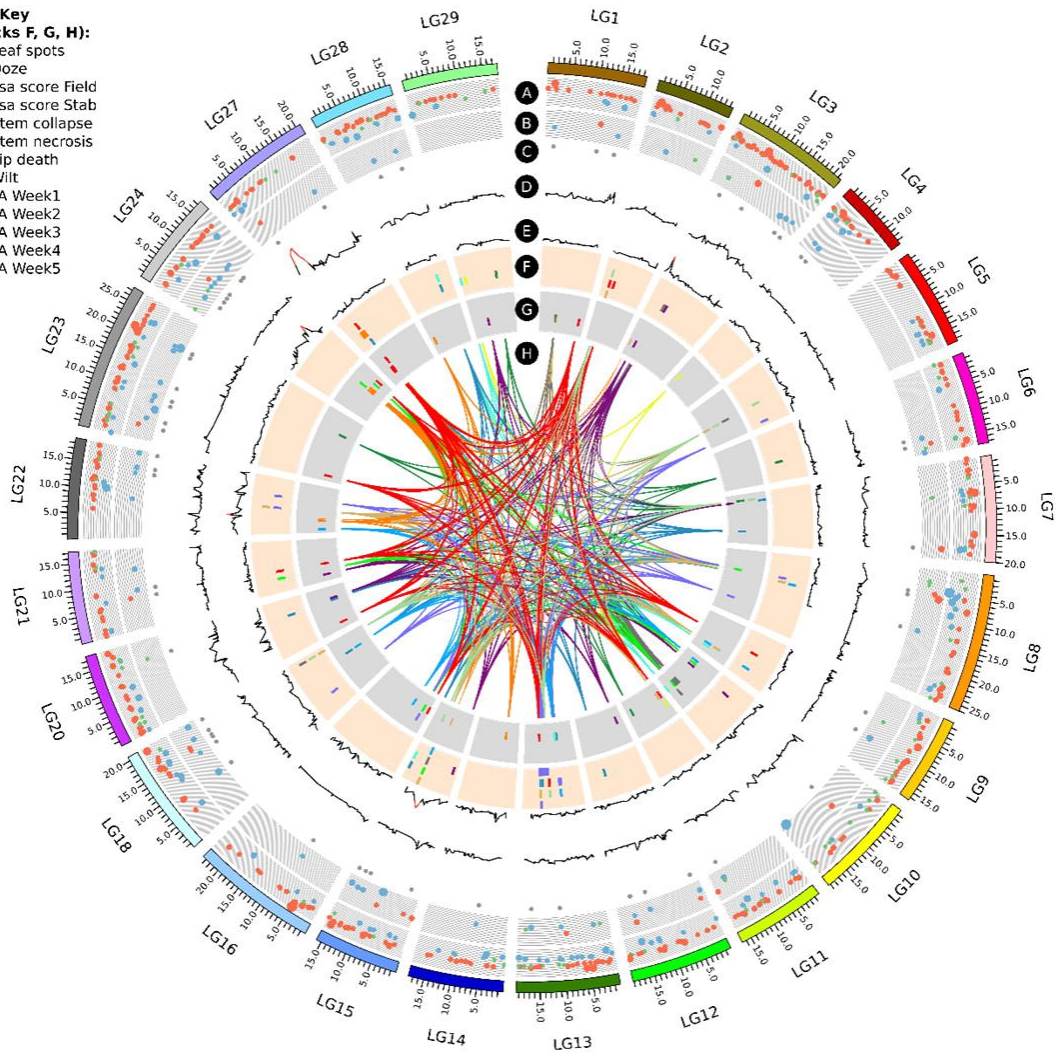

Figure 5

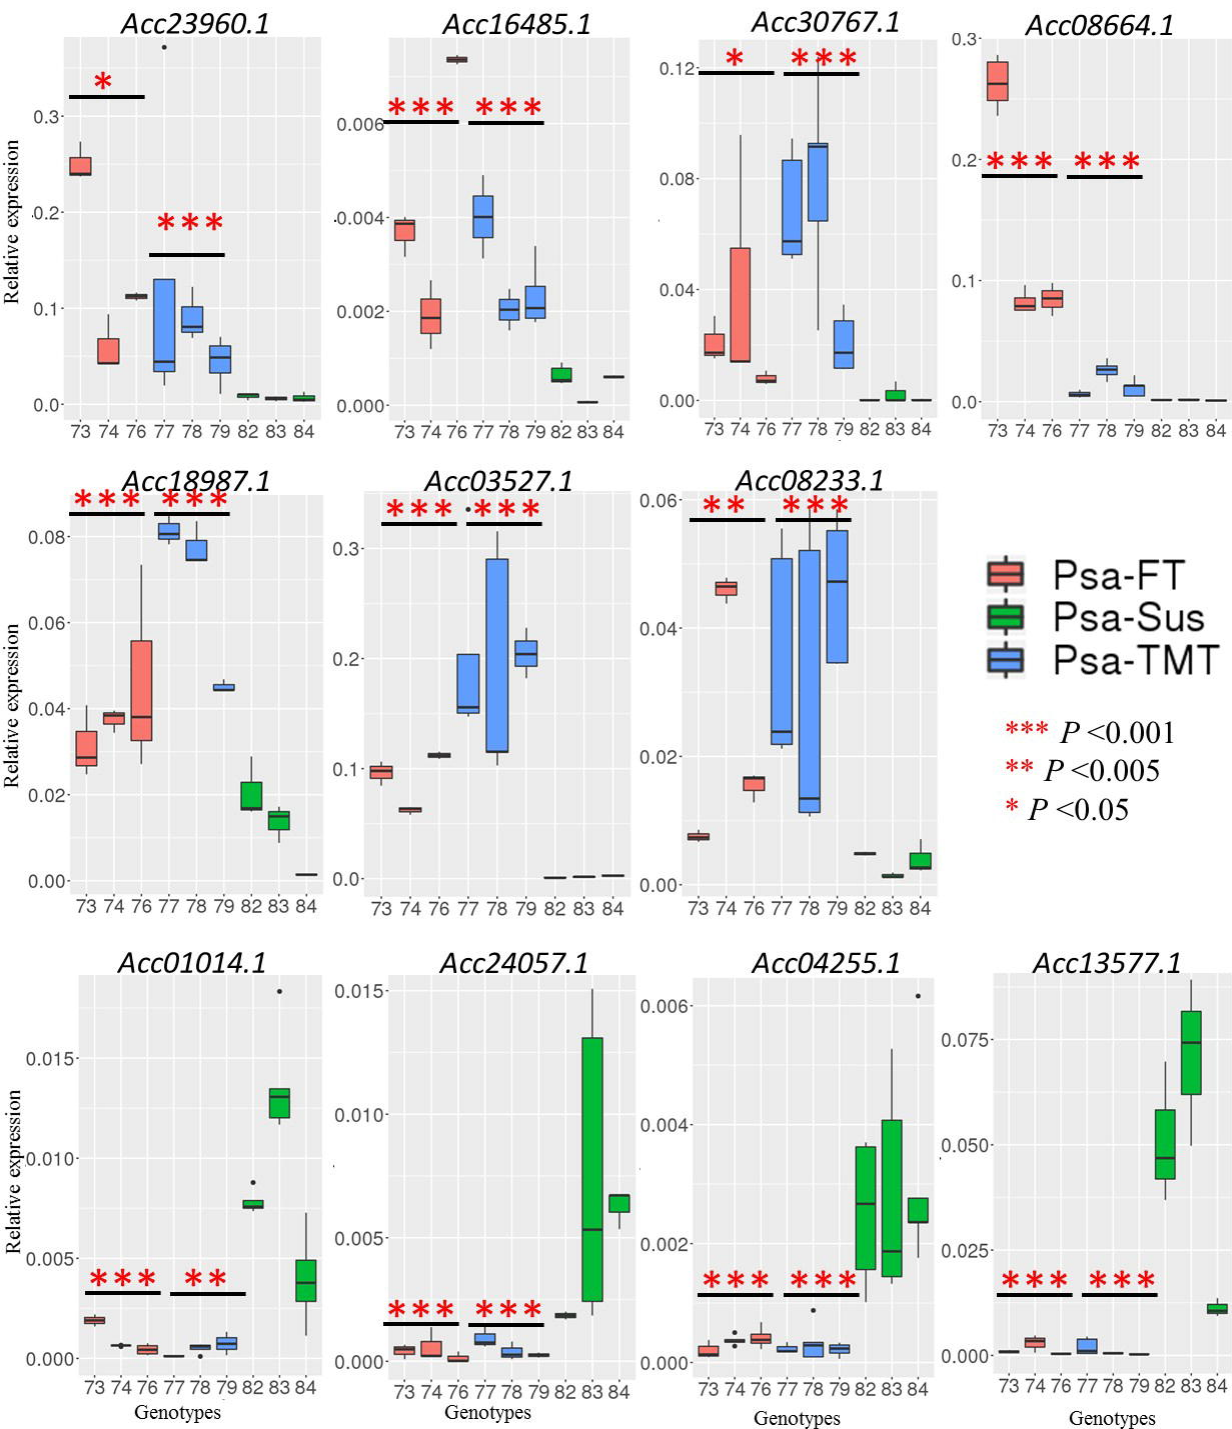

Figure 6
